1 **REGULATORY ARCHITECTURE OF GENE EXPRESSION VARIATION IN THE**  
2 **THREESPINE STICKLEBACK, *GASTEROSTEUS ACULEATUS*.**

3 **Victoria L. Pritchard<sup>1</sup>, Heidi M. Viitaniemi<sup>1</sup>, R.J. Scott McCairns<sup>2</sup>, Juha Merilä<sup>2</sup>,**  
4 **Mikko Nikinmaa<sup>1</sup>, Craig R. Primmer<sup>1</sup> & Erica H. Leder<sup>1</sup>.**

5 <sup>1</sup> Division of Genetics and Physiology, Department of Biology, University of Turku, Turku, Finland

6 <sup>2</sup> Ecological Genetics Research Unit, Department of Biosciences, University of Helsinki, Helsinki,  
7 Finland.

8

9 **Abstract**

10 Much adaptive evolutionary change is underlain by mutational variation in regions of the genome that  
11 regulate gene expression rather than in the coding regions of the genes themselves. An understanding  
12 of the role of gene expression variation in facilitating local adaptation will be aided by an  
13 understanding of underlying regulatory networks. Here, we characterize the genetic architecture of  
14 gene expression variation in the threespine stickleback (*Gasterosteus aculeatus*), an important model  
15 in the study of adaptive evolution. We collected transcriptomic and genomic data from 60 half-sib  
16 families using an expression microarray and genotyping-by-sequencing, and located QTL underlying  
17 the variation in gene expression (eQTL) in liver tissue using an interval mapping approach. We  
18 identified eQTL for several thousand expression traits. Expression was influenced by polymorphism  
19 in both *cis* and *trans* regulatory regions. *Trans* eQTL clustered into hotspots. We did not identify  
20 master transcriptional regulators in hotspot locations: rather, the presence of hotspots may be driven  
21 by complex interactions between multiple transcription factors. Observed hotspots did not co-locate  
22 with regions of the genome known to be involved in adaptive divergence between marine and  
23 freshwater habitats, suggesting they do not play a role in this well-documented stickleback radiation.

24

## 25 **Introduction**

26 It is now known that much adaptive evolution is underlain by changes in regions of the genome  
27 regulating gene expression, rather than in the protein coding regions of the genes themselves (Pavey  
28 *et al.* 2010). Recent work has demonstrated that much variation in gene expression is heritable, and  
29 thus evolvable via selection (e.g. Ayroles *et al.* 2009, Powell *et al.* 2013, Leder *et al.* 2015).  
30 Correspondingly, studies using model species have found that the genetic polymorphisms underlying  
31 phenotypic variation are typically not within genes (Flint and Mackay 2009). Variation in gene  
32 expression has been shown to underlie several well-documented cases of phenotypic and/or adaptive  
33 divergence. These include plumage coloration and beak shape in birds (Mallarino *et al.* 2011; Poelstra  
34 *et al.* 2015), mimetic wing patterns in butterflies (Reed *et al.* 2011; Hines *et al.* 2012), and flower  
35 colour (Durbin *et al.* 2003). Further, differences in gene expression patterns have been found to  
36 correlate with adaptive divergence in multiple species (e.g. Bernatchez *et al.* 2010; Barreto *et al.*  
37 2011). Dysregulation of gene expression due to interactions amongst regulatory loci has potential to  
38 cause reduced fitness of inter-population hybrids and thus contribute to reproductive isolation (Ellison  
39 and Burton 2008; Turner *et al.* 2014). However, it may also promote hybrid speciation by enabling  
40 hybrids to exploit new niches (Lai *et al.* 2006).

41 The genetic architecture of gene expression regulation can be investigated by treating expression  
42 variation as a quantitative trait and identifying the genomic locations associated with it (termed  
43 ‘expression quantitative trait loci’ or ‘eQTL’). Such studies have shown that the expression of a gene  
44 can be regulated by multiple genomic regions, which are traditionally classified as either *cis* or *trans*.  
45 *Cis* regulators, including promoters that activate transcription and enhancers that influence  
46 transcription levels, are located close to the regulated gene(s). They contain binding sites for  
47 regulatory molecules (proteins or mRNA) that are produced by more distant, *trans*, regulators. As *cis*  
48 regulators are expected to affect only one or a few focal genes, while *trans* regulators may have  
49 pleiotropic effects on many genes, *cis* and *trans* regulators are subject to different evolutionary  
50 dynamics. *Cis* regulatory changes are expected to be important drivers of local adaptation (Steige *et al.*  
51 2015), while intraspecific *trans* regulatory variation is considered more likely to be under  
52 purifying selection (Schaefer *et al.* 2013 but see also Landry *et al.* 2005 for discussion of *cis-trans*  
53 coevolution). Correspondingly, *trans* regulatory polymorphisms tend to affect gene expression less  
54 strongly than *cis* polymorphisms, and their effects are more likely to be non-additive (Zhang *et al.*  
55 2011; Gruber *et al.* 2012; Schaefer *et al.* 2013; Meiklejohn *et al.* 2014). Nevertheless, work in  
56 multiple species has demonstrated an important role for both *cis* and *trans* polymorphism in shaping  
57 expression variation (Cubillos *et al.* 2012) and the role of *trans* variation may have been  
58 underestimated due to the higher statistical power required to detect it (Mackay *et al.* 2009; Clément-  
59 Ziza *et al.* 2014). Interactions involving *trans* regulators may be particularly important in reducing the  
60 fitness of inter-population hybrids (Turner *et al.* 2014). Supporting the pleiotropic role of *trans*

61 regulators, a ubiquitous feature of eQTL studies is the identification of ‘*trans* eQTL hotspots’,  
62 genomic locations associated with expression variation in many distant genes which are thought to  
63 harbour one or more important *trans* regulators (Wu *et al.* 2008; Clément-Ziza *et al.* 2014;  
64 Meiklejohn *et al.* 2014).

65 The threespine stickleback (*Gasterosteus aculeatus*) is an important model in the study of adaptive  
66 evolution. Ancestral anadromous populations of threespine stickleback have repeatedly and  
67 independently colonized freshwater throughout the Northern Hemisphere (Taylor and McPhail 2000;  
68 Mäkinen *et al.* 2006). Sympatric and parapatric freshwater populations may exploit different habitats  
69 (Schluter and McPhail 1992; Roesti *et al.* 2012). The species is also distributed throughout semi-  
70 marine environments with large temperature and salinity gradients, such as estuaries and the brackish  
71 water Baltic Sea (McCairns and Bernatchez 2010; Guo *et al.* 2015; Konijnendijk *et al.* 2015).  
72 Successful colonization of these diverse habitats necessitates evolutionary adaptation to novel  
73 environmental conditions including changed temperature, salinity and predation regimens, a process  
74 that can occur rapidly (Barrett *et al.* 2011; Terekhanova *et al.* 2014; Lescak *et al.* 2015). Parallel  
75 adaptations between independently founded freshwater populations frequently involve the same  
76 regions of the genome and arise from pre-existing genetic variation in the marine population  
77 (Colosimo *et al.* 2005; Hohenlohe *et al.* 2010; Jones *et al.* 2012; Liu *et al.* 2014; Conte *et al.* 2015, but  
78 see DeFaveri *et al.* 2011; Leinonen *et al.* 2012; Ferchaud and Hansen 2016). Local adaptation in  
79 environmentally heterogeneous habitats such as the Baltic Sea (Guo *et al.* 2015) and lake-stream  
80 complexes (Roesti *et al.* 2015) has been shown to involve similar genomic pathways. Evidence  
81 suggests that much of this adaptation may be due to changes in gene regulation rather than protein  
82 structure (Jones *et al.* 2012). In addition, plasticity in gene expression in response to different  
83 environmental conditions may facilitate colonization of novel habitats in the first place (McCairns and  
84 Bernatchez 2010; Morris *et al.* 2014). Leder *et al.* (2015) recently demonstrated substantial  
85 heritability of gene expression variation within a brackish-water population of threespine stickleback,  
86 confirming that it is amenable to evolution. One well-documented locally adaptive trait, reduction of  
87 the pelvic girdle, is known to be underlain by variation in the *cis* regulatory region of the *Pitx1* gene  
88 (Chan *et al.* 2010). Recently, Di Poi *et al.* (2016) showed that differences in behaviour and response to  
89 stress between marine and freshwater sticklebacks may be modulated by variation in the expression of  
90 hormone receptors. Otherwise, the architecture of gene expression regulation in the threespine  
91 stickleback and its role in adaptive evolution is only starting to be explored (Chaturvedi *et al.* 2014).

92 An understanding of the potential role of gene expression variation in facilitating local adaptation will  
93 be aided by an understanding of the regulatory architecture underlying that gene expression. Here, we  
94 perform the first genome-wide study of this regulatory architecture in the threespine stickleback, by  
95 mapping QTL underlying the variation in expression of several thousand genes in a population from  
96 the Baltic Sea.

## 97 **Methods**

### 98 ***Experimental crosses.***

99 We used a multi-family paternal half-sib crossing design for QTL mapping. Crossing procedures have  
100 previously been detailed in Leinonen *et al.* (2011) and Leder *et al.* (2015). In short, 30 mature males  
101 and 60 gravid females were collected from the Baltic Sea for use as parents. Each male was  
102 artificially crossed with two females, producing 30 half-sib blocks each containing two full-sib  
103 families. Families were reared in separate 10L tanks with density standardized to 15 individuals per  
104 tank, temperature at  $17 \pm 1^\circ\text{C}$  and 12:12h light/dark photoperiod. At the age of six months, ten  
105 offspring from each family (5 treated, 5 controls) were subject to a temperature treatment as part of a  
106 related experiment (Leder *et al.* 2015), and immediately euthanized for DNA and RNA collection.

### 107 ***RNA preparation, microarray design, and data normalization***

108 RNA preparation, gene expression microarrays, hybridization, and normalization procedures are  
109 described in detail in Leder *et al.* (2009, 2015). Briefly, total RNA was isolated from offspring liver  
110 tissue using standard protocols. RNA that passed quality thresholds was labelled (Cy3 or Cy5) using  
111 the Agilent QuickAmp Kit, with equal numbers of individuals within family groups (control &  
112 temperature-treated; males & females) assigned to each dye. Labelled RNA was hybridized to a  
113 custom 8x15 microarray, with sample order randomized (Agilent Hi-RPM kit). Images of the arrays  
114 were acquired, image analysis was performed, and array quality was assessed as detailed in Leder *et al.*  
115 *et al.* (2015). Post-processed signals were standardized across arrays using a supervised normalization  
116 approach, implemented in the package 'snm' for R/Bioconductor (Mecham *et al.* 2010; R Core Team  
117 2015). Dye, array and batch (i.e. slide) were defined as 'adjustment variables'; sex, family and  
118 temperature treatment were defined as 'biological variables'. Following normalization, individual  
119 intensity values more than two standard deviations from their family-by-treatment mean, and probes  
120 with missing values for an entire family or >10% of individuals were removed. The final dataset  
121 contained 10,527 expression traits (10,495 genes plus 32 additional splice variants) and 563  
122 individuals (158 control females; 125 control males; 152 treated females; 128 treated males).

### 123 ***Genotyping-by-Sequencing***

124 For genotyping-by-sequencing of parents and offspring we used the method of Elshire *et al.* (2011)  
125 with an additional gel excision step to improve size selection. DNA was extracted from ethanol  
126 preserved fin tissue (parents) or frozen liver tissue (offspring) and DNA concentrations were  
127 measured using a NanoDrop ND-1000 spectrophotometer. DNA (80 ng) was digested with the  
128 restriction enzyme PstI 1.5 U (New England Biolabs) and 1x NEB buffer 3, 1x bovine serum albumin  
129 (BSA) and dH<sub>2</sub>O (3.3  $\mu\text{l}$ ) in a thermocycler (37°C, 2h; 75°C, 15min; 4°C, 10min). The digested DNA  
130 was ligated to adapters with T4-ligase 0.6x (New England Biolabs), 1x Ligase Buffer, 21  $\mu\text{l}$  dH<sub>2</sub>O and

131 50 nM of pooled forward and reverse adapters, which were prepared according to Elshire *et al.* (2011);  
132 ligation program: 22°C, 1h; 65°C, 30min; 4°C, 10min). Up to one hundred and four unique barcodes  
133 were used in each library to label individual samples. The ligation products were pooled into libraries  
134 and purified with a QIAquick PCR Purification Kit (Qiagen). The purified libraries were PCR  
135 amplified with the following components: Purified ligated library (20µl), reaction buffer 1x, MgCl<sub>2</sub>  
136 1.5nM (Bioline), primer mix 0.5 µM, dNTPs (Fermentas) 0.4µM, BioTaq 0.05 U (Bioline) and dH<sub>2</sub>O  
137 (20µl) (Amplification program: [72°C, 5min; 4 cycles [95°C, 30s; 95°C, 10s; 65°C, 30s; 70°C, 30s];  
138 11 cycles [95°C, 10s; 65°C, 30s; 72°C, 20s]; 72°C, 5min; 4°C, 10min). Lastly, we performed a  
139 manual size selection by loading 40 µl of the amplified library on a gel (MetaPhor [Lonza] 2.5 %, 150  
140 ml, 100 V. 1.5 h) and cutting the 300-400 bp range from the resultant smear. The DNA was extracted  
141 from the gel with a QIAquick Gel Extraction Kit (Qiagen). The cleaned product was again separated  
142 on a gel, cut and cleaned.

143 Six hundred and fifty one individuals, multiplexed into ten separate libraries (maximum library size =  
144 104 individuals), were sequenced with paired-end reading on the Illumina HiSeq2000 platform by the  
145 Beijing Genomics Institute (BGI). An additional 55 individuals (including duplicates) were paired-  
146 end sequenced on Illumina HiSeq platforms at the Finnish Institute for Molecular Medicine or at the  
147 University of Oslo.

#### 148 ***Variant calling***

149 Reads were split by barcode, and barcodes removed, using a custom perl script. Low quality bases  
150 were removed from the reads via window adaptive trimming using Trim.pl (available:  
151 <http://wiki.bioinformatics.ucdavis.edu/index.php/Trim.pl>, Illumina quality score  $\leq 20$ ). Sufficient  
152 numbers of reads were obtained for 626 of the 672 individuals sent for sequencing. Paired-end reads  
153 for each of these individuals were aligned to the BROAD S1 stickleback genome using BWA  
154 aln/sampe (v 0.6.2) with default parameters (Li and Durbin 2009). The threespine stickleback genome  
155 comprises 21 assembled chromosomes plus 1,823 un-placed genomic scaffolds. Unmapped reads, and  
156 reads with non-unique optimal alignments, pair-rescued alignments, or any alternative suboptimal  
157 alignments, were discarded from resulting SAM files. SAM files were converted to sorted BAM files  
158 using samtools 0.1.18 (Li *et al.* 2009) and variants were called within each paternal family using the  
159 samtools mpileup function with extended BAQ computation (options: -AED, max-depth 500), in  
160 combination with bcftools (Li *et al.* 2009). We did not degrade mapping quality for reads with large  
161 numbers of mismatches as we found this to reject high-quality reads due to fixed polymorphisms  
162 between our European stickleback samples and the North American stickleback genome. Indel and  
163 multi-allelic variants were discarded. Initial filters based on SNP quality and variability within and  
164 across families resulted in list of 26,290 candidate bi-allelic SNPs for further analysis. Samtools and  
165 bcftools, applied to each paternal family separately, were then used to call each individual for the

166 genotype at each of the 26,290 sites. Sites at which bcftools identified multiple variant types (SNPs,  
167 indels and multi-base polymorphisms) within and among families were removed, leaving 25,668  
168 successfully called variant sites.

### 169 ***Genotype quality control***

170 Vcftools (Danecek *et al.* 2011) was used to recode genotypes with a genotype quality phred score  
171 (GQ) < 25 or a sequencing depth (DP) < 8 or > 1000 to missing. Vcf files for all families were merged  
172 and the merged file converted to the input format for Plink 1.07 (Purcell *et al.* 2007). For SNPs on all  
173 autosomal chromosomes and the pseudoautosomal region of Chromosome 19 (see below), the  
174 following filters were applied in Plink: hwe (based on founders only) < 0.01, maximum missing  
175 genotypes = 0.25, minor allele frequency > 0.05, non-founders with > 70% missing data removed.  
176 Adjacent SNPs in complete linkage disequilibrium were manually consolidated into a single locus,  
177 with combined SNP information used to call genotypes.

178 Several approaches were used check for sample contamination or errors in barcode splitting and  
179 family assignment: in Plink, the *mendel* option was used to screen families for Mendelian errors, and  
180 sample relatedness was examined by graphically visualizing genome-wide IBD-sharing coefficients  
181 generated by *genome*; the program SNPPIT (Anderson 2012) was used to assign individuals to  
182 parents, based on five independent datasets of 100 SNPs; and 220 SNPs on Stratum II of  
183 Chromosome 19 (see below) were examined for their expected pattern in males and females (all  
184 heterozygous in males vs. all homozygous in females).

185 The stickleback Chromosome 19 is a proto-sex chromosome (Roesti *et al.* 2013; Schultheiß *et al.*  
186 2015), with a normally recombining pseudo-autosomal domain (approximately 0-2.5mB), a non-  
187 recombining domain in the male version (Stratum I, approximately 2.5-12mB) and a domain largely  
188 absent in the male version (Stratum II, approximately 12-20mB). For Stratum I, parental and offspring  
189 genotypes were inspected manually in order to identify the male-specific allele and this was recoded  
190 to a unique allele code ('9') for the purposes of linkage map construction. Where the male-specific  
191 allele could not be identified, all genotypes within a family were re-coded as missing. Genotypes were  
192 also inspected manually for Stratum II, and any SNP found to be heterozygous in males was excluded.  
193 All remaining Stratum II SNPs were considered to be hemizygous in males, and one of the alleles was  
194 also recoded as '9'.

### 195 ***Linkage map construction***

196 We constructed a linkage map using the improved version of Crimap (Green *et al.* 1990, available:  
197 <http://www.animalgenome.org/tools/share/crimap/>). Remaining Mendelian errors in the dataset were  
198 removed using the *set-me-missing* option in Plink. For each SNP, the number of informative meiosis



199 was examined using Crimap, and markers with < 150 informative meioses or within 500bp of one  
200 another were discarded.

201 The initial map build included 6,448 markers. Where applicable, SNPs were ordered according to the  
202 modified genome build of Roesti *et al.* (2013). We attempted to position all previously un-placed  
203 scaffolds containing at least two genotyped SNPs on to the map. Scaffolds were assigned to  
204 chromosome on the basis of LOD score using the Crimap function *two-point*, and then positioned  
205 using a combination of information from pilot Crimap *builds*, *chrompic*, and *fixed* together with  
206 known start and end points of previously assembled scaffolds (Roesti *et al.* 2013). Information from  
207 *chrompic* and *fixed* were also used to confirm the orientation of scaffolds newly placed by Roesti *et*  
208 *al.* (2013). Once all possible scaffolds had been placed, recombination distance between ordered  
209 SNPs was estimated using *fixed*. To refine the map, we iteratively removed SNP genotypes  
210 contributing to implied double crossovers within a 10 cM interval (presumed to be genotyping errors),  
211 and SNPs generating recombination distances of >1cM per 10,000 bp and recalculated distances using  
212 *fixed*. Remaining regions of unusually high recombination on the map were investigated by examining  
213 whether removal of individual SNPs altered map distance.

#### 214 ***eQTL identification***

215 Expression QTL (eQTL) were identified using an interval mapping approach (Knott *et al.* 1996)  
216 implemented in QTLMap 0.9. 0 (<http://www.inra.fr/qtlmap>; QTLMap option: *-- data-transcriptomic*).  
217 As we found that missing values in the expression trait file caused QTLMap to over-estimate the LRT  
218 statistic (see below), we eliminated these from the dataset by removing two individuals and 195  
219 expression traits. Eighty-seven genotyped parents, 474 genotyped and phenotyped offspring (mean  
220 no. offspring per family = 15.8, mean proportion of missing genotypes in offspring = 0.11; maximum  
221 = 0.56), and 10,332 expression traits were included in the analysis. We applied linkage analysis  
222 assuming a Gaussian trait distribution (QTLMap option: *--calcul = 3*), and included dye, temperature  
223 treatment, and sex as fixed factors in the model. Due to the relatively small size of some of our half-  
224 sib families, we examined sire effects only, with a separate QTL effect estimated for each sire. A fast  
225 algorithm was used to identify phase and estimate transmission probabilities at each chromosomal  
226 location (Elsen *et al.* 1999, QTLMap option: *--snp*). Autosomes and the pseudoautosomal portion of  
227 the sex chromosome were scanned at 1cM intervals, and the presence of QTL on a chromosome was  
228 assessed using a likelihood ratio test (LRT) under the hypothesis of one versus no QTL. LRT  
229 significance thresholds for each trait on each chromosome were identified empirically, by permuting  
230 fixed effects and traits amongst individuals within families and recalculating LRT scores (5000  
231 permutations). As the combination of 5000 permutations x 10,332 traits x 21 chromosomes was  
232 computationally prohibitive, we first performed permutations on a subset of 200 expression traits to  
233 identify a LRT threshold below which identified QTL were unlikely to be significant at chromosome-

234 wide  $p < 0.05$  (LRT = 55), and then used permutations to assess significance of all QTL above this  
235 threshold. The non-pseudo-autosomal region of the female Chromosome 19 can be considered  
236 analogous to the X chromosome; identification of QTL in this region requires estimation of dam  
237 effects and was therefore not performed. The 95% confidence interval for each QTL was estimated  
238 using the drop-off method implemented in QTLMap 0.9.7, which returns flanking map positions plus  
239 their nearest marker.

#### 240 *Cis vs. trans eQTL*

241 To discriminate *cis* vs. *trans* QTL, we compared inferred QTL location to the position of the  
242 expressed gene according to the BROAD *G. aculeatus* genome annotation v. 1.77 (available:  
243 [http://ftp.ensembl.org/pub/release-77/gtf/gasterosteus\\_aculeatus/](http://ftp.ensembl.org/pub/release-77/gtf/gasterosteus_aculeatus/)). All positions on the BROAD  
244 annotation were re-coded to positions on our modified chromosome assemblies. We considered a  
245 QTL to be in *cis* if the SNP closest to the upper or lower 95% confidence bounds of that QTL was  
246 within 5Mb of the regulated gene; all other QTL were considered *trans*-QTL. For genes on scaffolds  
247 un-anchored to our assembly, we also used information on scaffold position available in the recently  
248 published map of Glazer *et al.* (2015). Following Johnsson *et al.* (2015) we applied a local  
249 significance threshold (chromosome-wide  $p < 0.01$ ) for evaluation of possible *cis*-QTL and a genome-  
250 wide significance threshold (genome-wide  $p < 0.021$ , = chromosome-wide threshold of  $0.001 * 21$   
251 chromosomes) for evaluation of possible *trans*-QTL. Although this significance threshold is  
252 permissive, we considered it acceptable as our aim was to analyse the eQTL distribution across the  
253 genome rather than to identify individual QTL-locus associations. Similar significance thresholds  
254 have been used for eQTL detection in comparable studies (e.g. Whiteley *et al.* 2008).

255 To ask whether the effect of variation in *trans* regulatory sites was more often non-additive than the  
256 effect of variation in *cis* regulatory sites, we examined the narrow sense heritability ( $h^2$ ) and  
257 dominance proportion of genetic variance ( $d^2$ ) estimated for each expression trait by Leder *et al.*  
258 (2015) and provided in the Supplementary Data for that paper.

#### 259 *Genes with plastic vs. non-plastic expression*

260 To investigate whether genes exhibiting an alteration in expression level in response to a temperature  
261 stress treatment (i.e. those exhibiting environmental plasticity) had a different underlying regulatory  
262 architecture to those not exhibiting such a response, we divided genes into a 'responding' and 'non-  
263 responding' group based on the results in Leder *et al.* (2015) and compared the frequency and position  
264 of *cis* and *trans* eQTL between the two groups.

#### 265 *Evaluation of eQTL hotspots*



266 As all identified eQTL had wide 95% confidence intervals, meaning that physically close eQTL  
267 positions could be due to the effect of the same locus (see below), we evaluated potential eQTL  
268 hotspots by counting eQTL within 5cM bins across the genome ('hotspot size' = number of eQTL).  
269 Where the number of 1cM bins within a chromosome was not a simple multiple of 5, bin sizes at the  
270 start and/or end of the chromosome were increased to 6 or 7. To obtain an empirical significance  
271 threshold above which clusters of eQTL could be considered a 'hotspot', we simulated the expected  
272 neutral distribution of eQTL across the genome using a custom script. We performed 5000  
273 simulations: for each, we assigned  $n$  eQTL (where  $n$  = relevant number of significant eQTL)  
274 randomly across the 3,062 1cM bins of the genome and then summed them into 5cM (or larger) bins  
275 as described above. Conservatively, we compared the size of hotspots in the real data to the size  
276 distribution of the largest hotspot observed over each of the 5000 simulations.

### 277 *Association of eQTL with regions under selection*

278 Hohenlohe *et al.* (2010), Jones *et al.* (2012), and Terekhanova *et al.* (2014) documented parallel  
279 regions of the genome divergent between marine and freshwater sticklebacks on Chromosomes 1, 4  
280 (three regions), 7, 11 and 21, and clusters of QTL associated with morphological variation also occur  
281 on Chromosome 20 (Miller *et al.* 2014). We investigated whether these regions harboured important  
282 *trans* regulators that might contribute to marine/freshwater adaptation by comparing the location of  
283 these regions with the location of our identified *trans* eQTL hotspots. We also compared hotspot  
284 location to regions of the genome inferred by Guo *et al.* (2015) to be involved in adaptive  
285 differentiation amongst different stickleback populations in the Baltic Sea.

### 286 *Ortholog identification*

287 In order to maximize the functional information available, we identified human orthologues for *G.*  
288 *aculeatus* genes. As a first attempt, we used BioMart (Durinck *et al.* 2005; Smedley *et al.* 2009) to  
289 identify human orthologues and obtain the HGNC symbols for the human genes. When BioMart  
290 failed to return a human orthologue, protein BLAST searches were used to identify orthologues using  
291 the Ensembl human protein database. The identifier conversion tool, db2db, from bioDBnet  
292 (<https://biodbnet-abcc.ncifcrf.gov/db/db2db.php>) was used to convert between Ensembl identifiers  
293 and HGNC gene symbols when needed (Mudunuri *et al.* 2009).

### 294 *Hotspot annotation*

295 For functional annotation analysis of *G. aculeatus* genes, Human Ensembl IDs were used as input into  
296 AmiGO2 (Carbon *et al.* 2009) or the Database for Annotation, Visualization and Integrated Discovery  
297 (DAVID, Huang *et al.* 2009a; b). To identify regulatory genes physically associated with an eQTL  
298 hotspot, we defined hotspot confidence boundaries as being the most frequently observed 95%  
299 confidence limits of all significant eQTL centred in the hotspot. We identified the map markers

300 closest to the two boundaries (Table S3), and used AmiGO2 to search for intervening genes annotated  
301 with ‘molecular function’ or ‘biological process’ Gene Ontology (GO) terms that contained the words  
302 ‘transcription’ and ‘regulation’. As an important transcriptional regulator generating a hotspot might  
303 itself be regulated by the hotspot rather than physically present within it, we repeated this analysis for  
304 all genes with eQTL mapped to the hotspot. We used DAVID to examine GO term enrichment for the  
305 sets of genes with significant eQTL mapping to each hotspot, using the 9,071 genes on the microarray  
306 with identified human orthologues as the background.

### 307 *Upstream regulator and functional interaction analyses*

308 To search for regulatory genes which may be responsible for the expression variation in genes with  
309 identified *trans* eQTL, we used the upstream regulator analysis in the Ingenuity Pathway Analysis  
310 (IPA) software (Qiagen). This analysis uses a Fisher’s Exact Test to determine whether genes in a test  
311 dataset are enriched for known targets of a specific transcription factor. We used the human HGNC  
312 symbols as identifiers in IPA. First we examined all genes that had a significant *trans*- eQTL  
313 mapping to any location at a genome-wide  $p < 0.021$  (chromosome –wide  $p < 0.001$ ). To investigate in  
314 more detail the upstream regulators potentially involved in generating eQTL hotspots, we lowered our  
315 stringency and also examined all genes with *trans* eQTL mapping to the hotspot locations at genome-  
316 wide  $p < 0.057$  (chromosome-wide  $p < 0.0027$ ).

317 Since transcription is typically initiated by a complex of genes rather than a single transcription factor,  
318 we examined functional relationships among the identified upstream regulators for each hotspot  
319 (Table S7b), the genes located within a hotspot, and the genes with significant eQTL mapping to that  
320 hotspot (Table S3; *cis* eQTL significant at chromosome-wide  $p < 0.01$ , *trans* eQTL significant at  
321 genome-wide  $p < 0.021$ ), using STRING v10 (Jensen *et al.* 2009, <http://string-db.org/>). We searched  
322 for evidence of functional relationships from experiments, databases and gene co-expression, and  
323 applied a minimum required interaction score of 0.4.

## 324 **Results**

### 325 *Genotyping by sequencing*

326 For the 604 sticklebacks that we retained for analysis, we obtained a total of 583,032,024 raw paired  
327 reads (40,357 – 11,940,726 per individual, median=834,286). Approximately 67% of these reads  
328 remained aligned to the stickleback genome following removal of reads with non-unique optimal  
329 alignments, any alternative suboptimal alignments, or pair-rescued alignments (range 36.2% - 78.8%,  
330 median = 70.1%). Raw read and alignment statistics for each individual are provided in Table S0.

### 331 *Linkage map construction*

332 Following SNP calling and quality control steps 13,809 of the original 25,668 SNPs, genotyped in  
333 604 individuals (mean number of offspring per family = 18), were available for linkage map  
334 construction. Following removal of markers with < 150 informative meioses or within 500bp, 6,448  
335 SNPs were included in the initial map build. The final sex-averaged linkage map spanned 3,110 cM  
336 Kosambi (including the complete Chromosome 19) and included 5,975 markers, of which  
337 approximately 45% were located at the same map position as another marker (Figure 1, Figure S1,  
338 Table S1). Forty-three previously un-placed scaffolds (10.35 mB) were added to the chromosome  
339 assemblies of Roesti *et al.* (2012, Table S2). Thirty-five of these scaffolds were also recently added to  
340 the stickleback assembly in an independent study by Glazer *et al.* (2015). Although there were some  
341 differences in scaffold orientation, location of the new scaffolds was almost completely congruent  
342 between the two maps (Table S2). For QTL detection with QTLMap, the map was reduced to 3,189  
343 SNPs with unique positions (average inter-marker distance = 0.98cM, Table S1).

#### 344 ***Identification of cis and trans eQTL***

345 At chromosome-wide  $p < 0.01$ , we identified 5,226 eQTL associated with 4,411 expression traits  
346 (42.7% of the 10,322 expression traits examined, Table S3). Based on our recoded gene positions, we  
347 classified 2,072 of these as *cis* eQTL, 2,988 as *trans* eQTL, and 165 as unknown – that is, the  
348 expressed gene was located on a scaffold that had not been assigned to a *G. aculeatus* chromosome by  
349 either this study or Glazer *et al.* (2015; Table S3, Table S4). Five hundred and eighty of the *trans*  
350 eQTL were significant at genome-wide  $p < 0.021$ . Of these, 68.3% mapped to a chromosome other  
351 than the one containing the regulated gene. After application of this genome-wide significance  
352 threshold for *trans* eQTL, 2,713 expression traits (26.3% of those examined) remained associated  
353 with one or more significant *cis* or *trans* eQTL. Of these, 74.3% were associated with a *cis* eQTL,  
354 18.9% with one or more *trans* eQTL, 2.1% with both a *cis* and a *trans* eQTL and 4.7% with eQTL of  
355 unknown class (Table S3). The physical distribution across the genome of the 2,713 loci with  
356 significant *cis* or *trans* eQTL is shown in Figure S1. Mean 95% confidence interval of significant  
357 eQTL was 10.1 cM (range 1-74cM). Overall, *trans* regulated expression traits did not exhibit more  
358 dominance variance than *cis* regulated loci (*trans* regulated loci, mean  $h^2 = 0.32$ , mean  $d^2 = 0.16$ ; *cis*  
359 regulated loci: mean  $h^2 = 0.37$ , mean  $d^2 = 0.18$ ; values from Leder *et al.* 2015).

#### 360 ***Trans eQTL hotspots***

361 *Trans* eQTL (significant at genome wide  $p < 0.021$ ) were not evenly distributed across the genome  
362 and we identified eight 5cM bins, located on six different chromosomes, as containing eQTL clusters  
363 (7 or more eQTL;  $p < 0.05$  based on the largest hotspot observed in neutral simulations; Figure 1). A  
364 particularly large eQTL hotspot (38 *trans* eQTL within the 5cM bin) was identified close to one end  
365 of Chromosome 6, three hotspots (18, 10, and 9 *trans* eQTL) were present at separate locations on  
366 Chromosome 12, and remaining hotspots were located near the ends of Chromosomes 7, 8, 9 and 16

367 (13, 11, 7 and 9 *trans* eQTL). To eliminate the possibility that distant *cis* eQTL mis-classified as *trans*  
368 were contributing to observed hotspots, we repeated the analysis with the 396 *trans* eQTL that were  
369 on a different chromosome to their regulatory target: the same eight hotspots were identified (7 or  
370 more eQTL,  $p < 0.004$ ). Physical hotspot boundaries were assigned from inspection of eQTL hits and  
371 95% confidence intervals as follows: Chromosome 6, 111-116cM ('Chr6', 17,238,934-17,469,219bp);  
372 Chromosome 7, 5-12cM ('Chr7', 396,541-1,107,393bp); Chromosome 8, 134-139cM ('Chr8',  
373 19,917,746-20,316,565bp); Chromosome 9, 165-174cM ('Chr9', 19,822,078-20,440,410bp);  
374 Chromosome 12, 0-1cM ('Chr12a', 0-337,849bp); Chromosome 12, 72-79cM ('Chr12b', 5,853,981-  
375 7,440,742bp); Chromosome 12, 109-119cM ('Chr12c', 15,551,555-17,229,387bp); Chromosome 16,  
376 123-130cM ('Chr16', 17,658,526-18,257,571bp).

### 377 ***Genes with plastic vs. non-plastic expression***

378 Following FDR correction, 4,253 genes were found by Leder *et al.* (2015) to exhibit a significant  
379 change in expression in response to a temperature treatment. We identified significant eQTL  
380 underlying 1,033 of these genes (Table S3; eQTL type: 76.0% *cis*, 18.0% *trans*, 2.2% both, 3.8%  
381 unknown). The distribution of the 216 significant *trans* eQTL across 5cM bins indicated five hotspots  
382 (5 or more eQTL,  $p < 0.02$ , Figure S2), four of which had been previously observed in the full dataset.  
383 The Chromosome 16 hotspot was greatly increased in relative importance, and a new hotspot was  
384 observed on Chromosome 18 (Chr 6: 12 eQTL; Chr16: 9 eQTL; Chr12a: 5 eQTL; Chr12b: 5 eQTL;  
385 Chromosome 18, 'Chr18': 5 eQTL, 96-102cM, 13,870,895-14,643,331bp).

### 386 ***Association of eQTL with regions under selection***

387 None of our identified eQTL hotspots overlapped parallel regions of the genome divergent between  
388 marine and freshwater sticklebacks identified by Hohenlohe *et al.* (2010), Jones *et al.* (2012), and  
389 Terekhanova *et al.* (2014), or with the clusters of morphological QTL on Chromosome 20 (Miller *et al.*  
390 *et al.* 2014, Table S5). However, one genomic region identified as divergent between marine and  
391 freshwater populations by Terekhanova *et al.* (2014) alone overlapped with the Chr12b eQTL hotspot.  
392 Only four of the 297 genes inferred by Guo *et al.* (2015) as being under selection amongst Baltic Sea  
393 populations experiencing different temperature and salinity regimens overlapped observed eQTL  
394 hotspots (Chr7 and Chr12b, Table S5).

### 395 ***Hotspot annotation***

396 We identified human orthologues for 16,315 of the 20,787 protein-coding genes annotated on the  
397 Broad stickleback genome (78.5%, Table S4). There were 300 genes with human annotation  
398 physically located within the designated boundaries of the nine hotspots (Table S5). Of these, 41 had  
399 a GO term related to transcription regulation (Table 1, Table S6). In addition, 21 genes with  
400 significant *cis* eQTL or *trans* eQTL mapping to a hotspot had GO terms related to transcriptional

401 regulation (Table 1, Table S6). Following correction for multiple testing we found no significant GO  
402 term enrichment amongst any group of genes regulated by the same eQTL hotspot.

### 403 *Upstream regulator and functional interaction analyses*

404 When examining all 580 genes with *trans* eQTL significant at genome wide  $p < 0.021$ , 84  
405 significantly enriched upstream regulators were identified (Table S7a). In total, these regulators had  
406 244 of the genes in the dataset as known targets. Hepatocyte nuclear factor 4 $\alpha$  (HNF4A) was  
407 identified as a particularly important regulator, with 73 (29.9%) of these genes as downstream targets.  
408 Other important regulatory factors were: tumor protein p53 (TP53; 40 genes; 16.4%); estrogen  
409 receptor 1 (ESR1; 38 genes; 15.6%); myc proto-oncogene protein (MYC; 30 genes; 12.3%) and  
410 huntingtin (HTT; 27 genes; 11.1%). The full list of 85 significant upstream regulators is in Table S7a.

411 To identify upstream regulators that could be contributing to the nine eQTL hotspots (including one  
412 only observed when examining genes with a plastic response to temperature), we further examined all  
413 genes that had *trans* eQTL mapping to the hotspots at genome-wide  $p < 0.057$  (1120 genes). One  
414 hundred and fifty seven different enriched upstream regulators were identified for these genes (Table  
415 S7b). For genes with *trans* eQTL mapping to the Chr6, Chr12a, Chr12b, Chr12c and Chr18 hotspots,  
416 HNF4A remained an important regulator. Only two of the identified upstream regulators were  
417 physically located within a hotspot (serum response factor, SRF, Chr9; nuclear receptor subfamily 4,  
418 group A, member 1, NR4A1, Chr12b). Two had significant *trans* eQTL mapping to the Chr6 hotspot:  
419 catenin (cadherin-associated protein) beta (CTNNB1) and hypoxia inducible factor 1 alpha (HIF1A).  
420 One had a significant *trans* eQTL mapping to the Chr7 hotspot: junction plakoglobin (JUP), and one  
421 had a significant *trans* eQTL mapping to the Chr12b hotspot: Nuclear Receptor Subfamily 1, Group  
422 H, Member 4 (NR1H4; Table 1).

423 When the enriched upstream regulators, genes with *cis* eQTL mapping to a hotspot at chromosome-  
424 wide  $p < 0.01$ , and genes with *trans* eQTL mapping to a hotspot at genome wide  $p < 0.021$  were  
425 examined in STRING, multiple protein-protein interactions were found (Figure 2, Figure S4). In  
426 particular for the Chr6 hotspot we found an interaction network that included two molecules *trans*-  
427 regulated by this hotspot (CTNNB1 and HIF1A), one molecule *cis*-regulated by the hotspot (C1D  
428 Nuclear Receptor Co-Repressor), and multiple molecules inferred as important upstream regulators by  
429 IPA (Figure 2a). Similarly, for the Chr12b hotspot, we observed a large network of interactions  
430 involving molecules *cis* and *trans* regulated by the hotspot, molecules produced by genes physically  
431 located in the hotspot, and inferred upstream regulators (Figure 2b).

### 432 **Discussion**

433 In this study we identified regions of the genome underlying variation in gene expression in a marine  
434 population of threespine stickleback from northern Europe. We used a genotyping-by-sequencing

435 approach to generate an improved linkage map, and applied interval mapping to identify eQTL. Our  
436 new map was independent of that recently constructed by Glazer *et al.* (2015), and the congruent  
437 placement of scaffolds between the two maps confirms the reliability of these new genome  
438 assemblies. Our map covered a substantially larger distance in cM than those of Roesti *et al.* (2013)  
439 and Glazer *et al.* (2015), probably due to differences in experimental design. Nevertheless, for our  
440 Baltic Sea population, we observe very similar patterns of recombination rate variation across and  
441 between chromosomes as found by Roesti *et al.* (2013) for freshwater sticklebacks from central  
442 Europe and Glazer *et al.* (2015) for marine-freshwater crosses from western North America, (Figure  
443 S1). Thus, the large scale pattern of recombination rate variation across the genome may impose,  
444 and/or be under, similar evolutionary constraints throughout the range of the species.

445 Using a chromosome-wide significance threshold for *cis* regulatory loci and a genome-wide threshold  
446 for *trans* loci, we identified eQTL for just over a quarter of the 10,332 expression traits examined.  
447 Because at least 74% of these expression traits exhibit significant heritable variation (Leder *et al.*  
448 2015), and gene expression is commonly regulated by multiple eQTL, we expect that a much larger  
449 number of underlying eQTL remain undetected due to low statistical power. Despite expectations that  
450 *trans* regulatory regions might be under purifying selection due to their potentially pleiotropic effect,  
451 and that the effect of *trans* eQTL on expression will be weaker than that *cis* eQTL, we found many  
452 cases where gene expression was influenced by regulatory variation in *trans* but not in *cis*. This  
453 suggests that a frequently-used approach of detecting local selection by examining patterns of  
454 differentiation at markers linked to genes that are adaptive candidates (e.g. DeFaveri *et al.* 2011,  
455 Shimada *et al.* 2011) may fail to identify such selection as it is acting to change gene expression via  
456 *trans* regulatory regions. We did not observe any difference in additive vs dominance variance  
457 underlying genes found to be regulated in *cis* vs. those regulated in *trans*. However this may again be  
458 due to low statistical power to detect many of the underlying eQTL: genes are expected to be  
459 influenced by a large number of eQTL, meaning that the observed heritable variation is generated by a  
460 combination of additively and non-additively acting regulatory regions.

461 The *trans* eQTL that we detected were not randomly distributed across the genome but instead  
462 clustered into multiple eQTL hotspots. This observation is a ubiquitous feature of eQTL studies and is  
463 thought to indicate the existence of ‘master regulators’ acting in *trans* to influence many genes.  
464 However apparent eQTL hotspots may also arise as a statistical artefact as a result of many false  
465 positive QTL when testing thousands of expression traits in combination with spurious correlation  
466 between these traits due to uncorrected experimental factors (Wang *et al.* 2007; Breitling *et al.* 2008).  
467 Disentangling gene expression correlation that is due to common underlying regulatory architecture  
468 from that caused by experimental artefacts is a difficult analytical problem that we are unable to fully  
469 address here (Joo *et al.* 2014). Therefore, we caution that these hotspots should be verified using other  
470 stickleback populations and different approaches.



471 The parents for this study came from a genetically diverse marine population of threespine stickleback  
472 (DeFaveri *et al.* 2013). Local adaptation of threespine sticklebacks to freshwater has been  
473 demonstrated to arise, at least partly, from selection on standing genetic variation in the marine  
474 environment. Further, QTL underlying morphological divergence between marine and freshwater  
475 populations have been demonstrated to have pleiotropic effects (Rogers *et al.* 2012; Miller *et al.*  
476 2014), and frequently co-localize with regions of the genome found to be under parallel selection  
477 amongst independent freshwater colonisations. One way in which these regions could exert such  
478 pleiotropic effects is by harbouring loci that influence the expression of many genes, i.e. eQTL  
479 hotspots. However, only one of the *trans* eQTL hotspots found in this study overlapped with genomic  
480 regions found to be associated with marine/freshwater divergence by Hohenlohe *et al.* (2010), Jones  
481 *et al.* (2012), or Terekhanova *et al.* (2014), indicating that they do not underlie the multiple parallel  
482 changes observed when sticklebacks colonize freshwater. It remains possible that regulatory hotspots  
483 acting in tissues or life stages that we did not examine do have a role in this freshwater adaptation.

484 To investigate the potential genetic mechanisms underlying the nine observed eQTL hotspots we  
485 searched for associated loci with known transcriptional regulatory functions, and performed upstream  
486 regulator analysis for the genes with eQTL in the hotspots. Although the pathways regulating  
487 transcription are still poorly characterized for most genes, particularly in non-mammalian species,  
488 these analyses can provide useful preliminary information. We found no evidence that eQTL hotspots  
489 were due to the presence of a single ‘master’ regulatory locus, or a cluster of regulatory genes, at the  
490 hotspot locations. Although many genes with roles in transcriptional regulation were present in, or  
491 regulated by, hotspots, finding such genes is not unexpected: approximately 10% of the human  
492 orthologues of BROAD stickleback genes are annotated with the GO terms that we used to identify  
493 transcriptional regulators. It is also possible that the regulatory elements generating such hotspots are  
494 not annotated coding genes: microRNAs and long non-coding RNAs are potentially important *trans*  
495 regulators (Vance and Ponting 2014) and not yet well characterized across the stickleback genome.

496 Our results suggest that, alternatively, these hotspots may be generated by a complex interaction of  
497 multiple transcription regulators. Several well-characterized regulatory proteins were identified as  
498 upstream regulators for numerous genes with eQTL within the hotspots. In particular, HNF4A was  
499 identified as a strongly enriched regulator for all genes with significant *trans* eQTL (Table S7a), and  
500 the subsets of genes with *trans* eQTL mapping to the hotspots on Chromosome 6, Chromosome 12,  
501 and Chromosome 18 (Table S7b). In mammals, HNF4A is known to be a master regulator of  
502 transcription in the liver (Odom *et al.* 2004). Although the gene is not physically located in any  
503 hotspot, and we were unable to identify any significant eQTL underlying its expression, it is less than  
504 300 kb from hotspot Chr12b. HNF4A likely acts through direct and indirect interactions with other  
505 proteins to regulate transcription. Interacting molecules particularly of interest in respect to hotspot  
506 locations are HIF1A and CTNNB1 (*trans* regulated by the Chr6 hotspot, Fig. 2a) and NR4A1 (located

507 in the Chr12b hotspot, Fig. 2b): all of these are also identified as significantly enriched upstream  
508 regulators when examining genes with *trans* eQTL mapping to any of the nine hotspots (Table S7b).  
509 CTNNB1 is an important transcriptional coactivator in the cell nucleus (Willert & Jones 2006).  
510 NR4A1 along with its subfamily members NR4A2 (*trans* regulated by the Chr16 hotspot) and NR4A3  
511 (not on microarray) are orphan nuclear receptors that interact with other regulators to influence  
512 transcription (Ranhotra 2015). From the point of view of local adaptation, HIF1A is particularly  
513 interesting. It is part of a transcriptional complex (HIF) that alters the expression of numerous genes  
514 in response to low oxygen conditions. HIF1A has been demonstrated to regulate responses to hypoxia  
515 in fishes (Nikinmaa and Rees 2005 Liu *et al.* 2013) and is also involved in inflammation and  
516 temperature adaptation (Rissanen *et al.* 2006; Liu *et al.* 2013). It has been investigated as a possible  
517 selective target for adaptation to low-oxygen conditions, such as those encountered in benthic  
518 habitats, in various fish species. Rytkönen *et al.* (2007) found no association between variation in the  
519 HIF1A coding region and adaptation to hypoxic conditions across species, and markers linked to  
520 HIF1A do not appear to be under directional selection amongst Baltic Sea stickleback populations  
521 (Shimada *et al.* 2011). HIF1A is known to be transcriptionally regulated in fish (Liu *et al.* 2013), and  
522 the identification of a *trans* eQTL for HIF1A demonstrates that regulatory variation for this gene is  
523 present in Baltic Sea sticklebacks and could be an alternative target of selection. HNF4A has also  
524 been found to be an important regulator of hypoxia response (Xu *et al.* 2011).

525 HNF4A was not implicated in the regulation of genes with *trans* eQTL mapping to the Chr7, Chr8,  
526 Chr9 or Chr16 hotspots, suggesting that different regulatory complexes may underlie these  
527 additional hotspots. Comparison of the regulatory architecture underlying genes exhibiting a plastic  
528 response to the temperature treatment to that underlying genes not responding indicates that the Chr16  
529 and Chr18 eQTL hotspots are particularly strongly associated with this gene expression plasticity.  
530 These eQTL hotspots are both linked with the gene bone morphogenic protein 2 (BMP-2, Table 1),  
531 suggesting that this may have a role in mediating such plasticity, although we are unable to examine  
532 this further here.

533 In conclusion, we have performed the first genome-wide characterisation of the regulatory  
534 architecture of gene expression in *G. aculeatus*. We found that variation in gene expression was  
535 influenced by polymorphism in both *cis*-acting and *trans* acting regulatory regions. *Trans*-acting  
536 eQTLs clustered into hotspots, however these did not co-locate with regions of the genome known to  
537 be involved in adaptive divergence among marine and freshwater threespine sticklebacks. Hotspots  
538 locations appear to be mediated by complex interactions amongst regulator molecules rather than the  
539 presence of few 'master regulators'. Our broad-scale study suggests many avenues for finer-scale  
540 investigation of the role of transcriptional regulation in stickleback evolution.

541

542 **Data accessibility**

543 Raw and normalized microarray data, in addition to R scripts describing the normalization procedure,  
544 are available in the ArrayExpress database ([www.ebi.ac.uk/arrayexpress](http://www.ebi.ac.uk/arrayexpress)) under accession number E-  
545 MTAB-3098. RAD sequence reads for each individual are to be deposited in the NCBI Sequence  
546 Read Archive. Input files and scripts will be deposited in a relevant archive on article publication.

547 **Acknowledgements**

548 This work was funded by grants from Academy of Finland to C.P., E.L., M. N. and J.M. (grant nos.  
549 129662, 134728, 133875, 136464, 141231, 250435 and 265211). Tiina Sävilammi wrote the script for  
550 barcode splitting and we thank her for bioinformatics advice. We also thank the numerous people who  
551 helped in obtaining and maintaining sticklebacks. Generous computing resources were provided by  
552 the Finnish Centre for Scientific Computing (CSC-IT). Research was conducted under an ethical  
553 license from the University of Helsinki (HY121-06).

554 **References**

555 Anderson E. C., 2012 Large-scale parentage inference with SNPs: an efficient algorithm for statistical  
556 confidence of parent pair allocations. *Stat. Appl. Genet. Mol. Biol.* **11**.

557 Ayroles J. F., Carbone M. A., Stone E. A., Jordan K. W., Lyman R. F., Magwire M. M., *et al.* 2009  
558 Systems genetics of complex traits in *Drosophila melanogaster*. *Nat. Genet.* **41**: 299–307.

559 Barreto F. S., Moy G. W., Burton R. S., 2011 Interpopulation patterns of divergence and selection  
560 across the transcriptome of the copepod *Tigriopus californicus*. *Mol. Ecol.* **20**: 560–72.

561 Barrett R. D. H., Paccard A., Healy T. M., Bergek S., Schulte P. M., Schluter D., Rogers S. M., 2011  
562 Rapid evolution of cold tolerance in stickleback. *Proc. Biol. Sci.* **278**: 233–8.

563 Bernatchez L., Renaut S., Whiteley A. R., Derome N., Jeukens J., Landry L., *et al.* 2010 On the origin  
564 of species: insights from the ecological genomics of lake whitefish. *Philos. Trans. R. Soc. Lond.*  
565 *B. Biol. Sci.* **365**: 1783–800.

566 Breitling R., Li Y., Tesson B. M., Fu J., Wu C., Wiltshire T., *et al.* 2008 Genetical genomics:  
567 spotlight on QTL hotspots. *PLoS Genet.* **4**: e1000232.

568 Carbon, S., Ireland, A., Mungall, C. J., Shu, S., Marshall, B., Lewis, S., AmiGO Hub, Web Presence  
569 Working Group, 2009. AmiGO: online access to ontology and annotation data. *Bioinformatics.*  
570 **25**: 288-9.

- 571 Chan Y. F., Marks M. E., Jones F. C., Villarreal G., Shapiro M. D., Brady S. D., *et al.* 2010 Adaptive  
572 evolution of pelvic reduction in sticklebacks by recurrent deletion of a *Pitx1* enhancer. *Science*  
573 **327**: 302–5.
- 574 Chaturvedi A., Raeymaekers J. A. M., Volckaert F. A. M., 2014 Computational identification of  
575 miRNAs, their targets and functions in three-spined stickleback (*Gasterosteus aculeatus*). *Mol.*  
576 *Ecol. Resour.* **14**: 768–77.
- 577 Clément-Ziza M., Marsellach F. X., Codlin S., Papadakis M. A., Reinhardt S., Rodríguez-López M.,  
578 *et al.* 2014 Natural genetic variation impacts expression levels of coding, non-coding, and  
579 antisense transcripts in fission yeast. *Mol. Syst. Biol.* **10**: 764.
- 580 Colosimo P. F., Hosemann K. E., Balabhadra S., Villarreal G., Dickson M., Grimwood J., *et al.* 2005  
581 Widespread parallel evolution in sticklebacks by repeated fixation of *Ectodysplasin* alleles.  
582 *Science* **307**: 1928–33.
- 583 Conte G. L., Arnegard M. E., Best J., Chan Y. F., Jones F. C., Kingsley D. M., *et al.* 2015 Extent of  
584 QTL reuse during repeated phenotypic divergence of sympatric threespine stickleback. *Genetics*  
585 **201**: 1189–200.
- 586 Cubillos F. A., Coustham V., Loudet O., 2012 Lessons from eQTL mapping studies: non-coding  
587 regions and their role behind natural phenotypic variation in plants. *Curr. Opin. Plant Biol.* **15**:  
588 192–8.
- 589 Danecek P., Auton A., Abecasis G., Albers C. A., Banks E., DePristo M. A., *et al.* 2011 The variant  
590 call format and VCFtools. *Bioinformatics* **27**: 2156–8.
- 591 DeFaveri J., Jonsson P. R., Merilä J., 2013 Heterogeneous genomic differentiation in marine  
592 threespine sticklebacks: adaptation along an environmental gradient. *Evolution* **67**: 2530–2546.
- 593 DeFaveri J., Shikano T., Shimada Y., Goto A., Merilä J., 2011 Global analysis of genes involved in  
594 freshwater adaptation in threespine sticklebacks (*Gasterosteus aculeatus*). *Evolution* **65**: 1800–  
595 7.
- 596 Di-Poï C., Bélanger, D., Amyot, M. Rogers, S., Aubin-Horth, N. 2016. Receptors rather than signals  
597 change in expression in four physiological regulatory networks during evolutionary divergence  
598 in threespine stickleback. *Mol. Ecol.* (accepted).
- 599 Durbin M. L., Lundy K. E., Morrell P. L., Torres-Martinez C. L., Clegg M. T., 2003 Genes that  
600 determine flower color: the role of regulatory changes in the evolution of phenotypic

- 601 adaptations. *Mol. Phylogenet. Evol.* **29**: 507–18.
- 602 Durinck S., Moreau Y., Kasprzyk A., Davis S., Moor B. De, Brazma A., Huber W., 2005 BioMart and  
603 Bioconductor: a powerful link between biological databases and microarray data analysis.  
604 *Bioinformatics* **21**: 3439–40.
- 605 Ellison C. K., Burton R. S., 2008 Genotype-dependent variation of mitochondrial transcriptional  
606 profiles in interpopulation hybrids. *Proc. Natl. Acad. Sci. U. S. A.* **105**: 15831–15836.
- 607 Elsen J.-M., Mangin B., Goffinet B., Boichard D., Roy P. Le, 1999 Alternative models for QTL  
608 detection in livestock. I. General introduction. *Genet. Sel. Evol.* **31**: 213.
- 609 Elshire R. J., Glaubitz J. C., Sun Q., Poland J. A., Kawamoto K., Buckler E. S., Mitchell S. E., 2011 A  
610 robust, simple genotyping-by-sequencing (GBS) approach for high diversity species. *PLoS One*  
611 **6**: e19379.
- 612 Ferchaud A.-L., Hansen M. M., 2016 The impact of selection, gene flow and demographic history on  
613 heterogeneous genomic divergence: threespine sticklebacks in divergent environments. *Mol.*  
614 *Ecol.* **25**: 238–295.
- 615 Flint J., Mackay T. F. C., 2009 Genetic architecture of quantitative traits in mice, flies, and humans.  
616 *Genome Res.* **19**: 723–33.
- 617 Glazer A. M., Killingbeck E. E., Mitros T., Rokhsar D. S., Miller C. T., 2015 Genome assembly  
618 improvement and mapping convergently evolved skeletal traits in sticklebacks with genotyping-  
619 by-sequencing. *G3* **5**: 1463–72.
- 620 Green, P., Falls, K., Crooks, S. 1990. Documentation for CRI-MAP, version 2.4. Washington  
621 University School of Medicine, St. Louis, MO.
- 622 Gruber J. D., Vogel K., Kalay G., Wittkopp P. J., 2012 Contrasting properties of gene-specific  
623 regulatory, coding, and copy number mutations in *Saccharomyces cerevisiae*: frequency, effects,  
624 and dominance. *PLoS Genet.* **8**: e1002497.
- 625 Guo B., DeFaveri J., Sotelo G., Nair A., Merilä J., 2015 Population genomic evidence for adaptive  
626 differentiation in Baltic Sea three-spined sticklebacks. *BMC Biol.* **13**: 19.
- 627 Hines H. M., Papa R., Ruiz M., Papanicolaou A., Wang C., Nijhout H. F., *et al.* 2012 Transcriptome  
628 analysis reveals novel patterning and pigmentation genes underlying *Heliconius* butterfly wing  
629 pattern variation. *BMC Genomics* **13**: 288.

- 630 Hohenlohe P. A., Bassham S., Etter P. D., Stiffler N., Johnson E. A., Cresko W. A., 2010 Population  
631 genomics of parallel adaptation in threespine stickleback using sequenced RAD tags. *PLoS*  
632 *Genet.* **6**: e1000862.
- 633 Huang D. W., Sherman B. T., Lempicki R. A., 2009a Systematic and integrative analysis of large  
634 gene lists using DAVID bioinformatics resources. *Nat. Protoc.* **4**: 44–57.
- 635 Huang D. W., Sherman B. T., Lempicki R. A., 2009b Bioinformatics enrichment tools: paths toward  
636 the comprehensive functional analysis of large gene lists. *Nucleic Acids Res.* **37**: 1–13.
- 637 Jensen L. J., Kuhn M., Stark M., Chaffron S., Creevey C., Muller J., *et al.* 2009. STRING 8 - a global  
638 view on proteins and their functional interactions in 630 organisms. *Nucleic Acids Res.* **37**:  
639 D412-6.
- 640 Johnsson M., Jonsson K. B., Andersson L., Jensen P., Wright D., 2015 Genetic regulation of bone  
641 metabolism in the chicken: similarities and differences to Mammalian systems. *PLoS Genet.* **11**:  
642 e1005250.
- 643 Jones F. C., Grabherr M. G., Chan Y. F., Russell P., Mauceli E., Johnson J., Swofford R., *et al.* 2012  
644 The genomic basis of adaptive evolution in threespine sticklebacks. *Nature* **484**: 55–61.
- 645 Joo J. W. J., Sul J. H., Han B., Ye C., Eskin E., 2014 Effectively identifying regulatory hotspots while  
646 capturing expression heterogeneity in gene expression studies. *Genome Biol.* **15**: r61.
- 647 Knott S. A., Elsen J. M., Haley C. S., 1996 Methods for multiple-marker mapping of quantitative trait  
648 loci in half-sib populations. *Theor. Appl. Genet.* **93**: 71–80.
- 649 Konijnendijk N., Shikano T., Daneels D., Volckaert F. A. M., Raeymaekers J. A. M., 2015 Signatures  
650 of selection in the three-spined stickleback along a small-scale brackish water - freshwater  
651 transition zone. *Ecol. Evol.* **5**: n/a–n/a.
- 652 Lai Z., Gross B. L., Zou Y., Andrews J., Riesberg L. H., 2006 Microarray analysis reveals differential  
653 gene expression in hybrid sunflower species. *Mol. Ecol.* **15**: 1213–1227.
- 654 Landry C. R., Wittkopp P. J., Taubes C. H., Ranz J. M., Clark A. G., Hartl D. L., 2005 Compensatory  
655 cis-trans evolution and the dysregulation of gene expression in interspecific hybrids of  
656 *Drosophila*. *Genetics* **171**: 1813–22.
- 657 Leder E. H., McCairns R. J. S., Leinonen T., Cano J. M., Viitaniemi H. M., Nikinmaa M., *et al.* 2015  
658 The evolution and adaptive potential of transcriptional variation in sticklebacks--signatures of  
659 selection and widespread heritability. *Mol. Biol. Evol.* **32**: 674–89.



- 660 Leder E., Merilä J., Primmer C., 2009 A flexible whole-genome microarray for transcriptomics in  
661 three-spine stickleback (*Gasterosteus aculeatus*). *BMC Genomics* **10**: 426.
- 662 Leinonen T., Cano J., Merilä J., 2011 Genetics of body shape and armour variation in threespine  
663 sticklebacks. *J. Evol. Biol.* **24**: 206–218.
- 664 Leinonen T., McCairns R. J. S., Herczeg G., Merilä J., 2012 Multiple evolutionary pathways to  
665 decreased lateral plate coverage in freshwater threespine sticklebacks. *Evolution* **66**: 3866–75.
- 666 Lescak E. A., Bassham S. L., Catchen J., Gelmond O., Sherbick M. L., Hippel F. A. von, Cresko W.  
667 A., 2015 Evolution of stickleback in 50 years on earthquake-uplifted islands. *Proc. Natl. Acad.*  
668 *Sci. USA* **112**: E7204–E7212.
- 669 Li H., Durbin R., 2009 Fast and accurate short read alignment with Burrows-Wheeler transform.  
670 *Bioinformatics* **25**: 1754–60.
- 671 Li H., Handsaker B., Wysoker A., Fennell T., Ruan J., Homer N., *et al.* 2009 The Sequence  
672 Alignment/Map format and SAMtools. *Bioinformatics* **25**: 2078–9.
- 673 Liu J., Shikano T., Leinonen T., Cano J. M., Li M.-H., Merilä J., 2014 Identification of major and  
674 minor QTL for ecologically important morphological traits in three-spined sticklebacks  
675 (*Gasterosteus aculeatus*). *G3* **4**: 595–604.
- 676 Liu S., Zhu K., Chen N., Wang W., Wan H., 2013 Identification of HIF-1 $\alpha$  promoter and expression  
677 regulation of HIF-1 $\alpha$  gene by LPS and hypoxia in zebrafish. *Fish Physiol. Biochem.* **39**: 1153-  
678 1163
- 679 Mackay T. F. C., Stone E. A., Ayroles J. F., 2009 The genetics of quantitative traits: challenges and  
680 prospects. *Nat. Rev. Genet.* **10**: 565–77.
- 681 Mäkinen H. S., Cano J. M., Merilä J., 2006 Genetic relationships among marine and freshwater  
682 populations of the European three-spined stickleback (*Gasterosteus aculeatus*) revealed by  
683 microsatellites. *Mol. Ecol.* **15**: 1519–34.
- 684 Mallarino R., Grant P. R., Grant B. R., Herrel A., Kuo W. P., Abzhanov A., 2011 Two developmental  
685 modules establish 3D beak-shape variation in Darwin's finches. *Proc. Natl. Acad. Sci. U. S. A.*  
686 **108**: 4057–62.
- 687 McCairns R. J. S., Bernatchez L., 2010 Adaptive divergence between freshwater and marine  
688 sticklebacks: insights into the role of phenotypic plasticity from an integrated analysis of  
689 candidate gene expression. *Evolution* **64**: 1029–47.

- 690 Mecham B. H., Nelson P. S., Storey J. D., 2010 Supervised normalization of microarrays.  
691 *Bioinformatics* **26**: 1308–15.
- 692 Meiklejohn C. D., Coolon J. D., Hartl D. L., Wittkopp P. J., 2014 The roles of cis- and trans-  
693 regulation in the evolution of regulatory incompatibilities and sexually dimorphic gene  
694 expression. *Genome Res.* **24**: 84–95.
- 695 Miller C. T., Glazer A. M., Summers B. R., Blackman B. K., Norman A. R., Shapiro M. D., *et al.*  
696 2014 Modular skeletal evolution in sticklebacks is controlled by additive and clustered  
697 quantitative trait loci. *Genetics* **197**: 405–20.
- 698 Morris M. R. J., Richard R., Leder E. H., Barrett R. D. H., Aubin-Horth N., Rogers S. M., 2014 Gene  
699 expression plasticity evolves in response to colonization of freshwater lakes in threespine  
700 stickleback. *Mol. Ecol.* **23**: 3226–40.
- 701 Mudunuri, U., Che, A., Yi, M., Stephens, R. M. 2009. bioDBnet: the biological database network.  
702 *Bioinformatics* **25**:555-6.
- 703 Nikinmaa M., Rees B. B., 2005 Oxygen-dependent gene expression in fishes. *Am. J. Physiol. Regul.*  
704 *Integr. Comp. Physiol.* **288**: R1079–90.
- 705 Odom, D. T., Zizlsperger, N., Gordon, D. B., Bell, G. W., Rinaldi, N. J., Murray, H. L., *et al.* 2004.  
706 Control of pancreas and liver gene expression by HNF transcription factors. *Science* **303**: 1378-  
707 1381.
- 708 Pavey S. A., Collin H., Nosil P., Rogers S. M., 2010 The role of gene expression in ecological  
709 speciation. *Ann. N. Y. Acad. Sci.* **1206**: 110–29.
- 710 Poelstra J. W., Vijay N., Hoepfner M. P., Wolf J. B. W., 2015 Transcriptomics of colour patterning  
711 and colouration shifts in crows. *Mol. Ecol.* **24**: 4617–28.
- 712 Powell J. E., Henders A. K., McRae A. F., Kim J., Hemani G., Martin N. G., *et al.* 2013 Congruence  
713 of additive and non-additive effects on gene expression estimated from pedigree and SNP data.  
714 *PLoS Genet.* **9**: e1003502.
- 715 Purcell S., Neale B., Todd-Brown K., Thomas L., Ferreira M. A. R., Bender D., *et al.* 2007 PLINK: a  
716 tool set for whole-genome association and population-based linkage analyses. *Am. J. Hum.*  
717 *Genet.* **81**: 559–75.
- 718 R Core Team 2015. R: a language and environment for statistical computing. Vienna, Austria: R  
719 Foundation for Statistical Computing.

- 720 Ranhotra, H. S. 2015 The NR4A orphan nuclear receptors: mediators in metabolism and diseases.  
721 Journal of Receptors and Signal Transduction 35, Iss. 2, 2015
- 722 Reed R. D., Papa R., Martin A., Hines H. M., Counterman B. A., Pardo-Diaz C., *et al.* 2011 Optix  
723 drives the repeated convergent evolution of butterfly wing pattern mimicry. Science **333**: 1137–  
724 41.
- 725 Rissanen E., Tranberg H. K., Sollid J., Nilsson G. E., Nikinmaa M., 2006 Temperature regulates  
726 hypoxia-inducible factor-1 (HIF-1) in a poikilothermic vertebrate, crucian carp (*Carassius*  
727 *carassius*). J. Exp. Biol. **209**: 994–1003.
- 728 Roesti M., Hendry A. P., Salzburger W., Berner D., 2012 Genome divergence during evolutionary  
729 diversification as revealed in replicate lake-stream stickleback population pairs. Mol. Ecol. **21**:  
730 2852–62.
- 731 Roesti M., Kueng B., Moser D., Berner D., 2015 The genomics of ecological vicariance in threespine  
732 stickleback fish. Nat. Commun. **6**: 8767.
- 733 Roesti M., Moser D., Berner D., 2013 Recombination in the threespine stickleback genome--patterns  
734 and consequences. Mol. Ecol. **22**: 3014–27.
- 735 Rogers S. M., Tamkee P., Summers B., Balabhadra S., Marks M., Kingsley D. M., Schluter D., 2012  
736 Genetic signature of adaptive peak shift in threespine stickleback. Evolution **66**: 2439–50.
- 737 Rytönen K. T., Vuori K. A. M., Primmer C. R., Nikinmaa M., 2007 Comparison of hypoxia-  
738 inducible factor-1 alpha in hypoxia-sensitive and hypoxia-tolerant fish species. Comp. Biochem.  
739 Physiol. Part D. Genomics Proteomics **2**: 177–86.
- 740 Schaefer B., Emerson J. J., Wang T.-Y., Lu M.-Y. J., Hsieh L.-C., Li W.-H., 2013 Inheritance of gene  
741 expression level and selective constraints on trans- and cis-regulatory changes in yeast. Mol.  
742 Biol. Evol. **30**: 2121–33.
- 743 Schluter D., McPhail J. D., 1992 Ecological character displacement and speciation in sticklebacks.  
744 Am. Nat. **140**: 85–108.
- 745 Schultheiß R., Viitaniemi H. M., Leder E. H., 2015 Spatial dynamics of evolving dosage  
746 compensation in a young sex chromosome system. Genome Biol. Evol. **7**: 581–90.
- 747 Shimada Y., Shikano T., Merilä J., 2011 A high incidence of selection on physiologically important  
748 genes in the three-spined stickleback, *Gasterosteus aculeatus*. Mol. Biol. Evol. **28**: 181–93.

- 749 Smedley D., Haider S., Ballester B., Holland R., London D., Thorisson G., Kasprzyk A., 2009  
750 BioMart--biological queries made easy. *BMC Genomics* **10**: 22.
- 751 Steige K. A., Laenen B., Reimegård J., Scofield D., Slotte T., 2015 The impact of natural selection on  
752 the distribution of cis-regulatory variation across the genome of an outcrossing plant. *BioRxiv*.
- 753 Taylor E. B., McPhail J. D., 2000 Historical contingency and ecological determinism interact to prime  
754 speciation in sticklebacks, *Gasterosteus*. *Proc. Biol. Sci.* **267**: 2375–84.
- 755 Terekhanova N. V, Logacheva M. D., Penin A. A., Neretina T. V, Barmintseva A. E., Bazykin G. A.,  
756 *et al.* 2014 Fast evolution from precast bricks: genomics of young freshwater populations of  
757 threespine stickleback *Gasterosteus aculeatus*. *PLoS Genet.* **10**: e1004696.
- 758 Turner L. M., White M. A., Tautz D., Payseur B. A., 2014 Genomic networks of hybrid sterility.  
759 *PLoS Genet.* **10**: e1004162.
- 760 Vance K. W., Ponting C. P., 2014 Transcriptional regulatory functions of nuclear long noncoding  
761 RNAs. *Trends Genet.* **30**: 348–55.
- 762 Wang S., Zheng T., Wang Y., 2007 Transcription activity hot spot, is it real or an artifact? *BMC Proc.*  
763 **1 Suppl 1**: S94.
- 764 Whiteley A. R., Derome N., Rogers S. M., St-Cyr J., Laroche J., Labbe A., *et al.* 2008 The phenomics  
765 and expression quantitative trait locus mapping of brain transcriptomes regulating adaptive  
766 divergence in lake whitefish species pairs (*Coregonus* sp.). *Genetics* **180**: 147–64.
- 767 Wickham, H. 2009 *ggplot2: Elegant Graphics for Data Analysis*. Springer New York.
- 768 Willert K., Jones, K. A. 2006. Wnt signaling: Is the party in the nucleus? *Genes Dev* **20**:1394–1404
- 769 Wu C., Delano D. L., Mitro N., Su S. V, Janes J., McClurg P., *et al.* 2008 Gene set enrichment in  
770 eQTL data identifies novel annotations and pathway regulators. *PLoS Genet.* **4**: e1000070.
- 771 Xu, H., Lu, A., Sharp, F. R. (2011) Regional genome transcriptional response of adult mouse brain to  
772 hypoxia. *BMC Genomics* **201112**:499
- 773 Zhang X., Cal A. J., Borevitz J. O., 2011 Genetic architecture of regulatory variation in *Arabidopsis*  
774 *thaliana*. *Genome Res.* **21**: 725–33.
- 775

776 **Table 1:** Known transcriptional regulators associated with identified eQTL hotspots. Human orthologues of stickleback genes were identified using BioMart.  
777 Location is as follows: ‘Hotspot’: annotated gene is in genomic region of hotspot; ‘Cis’: gene is cis-regulated by hotspot at chromosome wide p<0.01;  
778 ‘Trans’: gene is trans-regulated by hotspot at genome-wide p<0.021.

| Hotspot | Location           | Stickleback<br>Ensembl_ID | Human<br>Ensembl_ID | Gene Name | Description                                                          |
|---------|--------------------|---------------------------|---------------------|-----------|----------------------------------------------------------------------|
| Chr06   | <i>Cis</i>         | ENSGACG00000012317        | ENSG00000266412     | NCOA4     | Nuclear receptor coactivator 4                                       |
| Chr06   | <i>Cis</i>         | ENSGACG00000001371        | ENSG00000167380     | ZNF226    | Zinc finger protein 226                                              |
| Chr06   | Hotspot            | ENSGACG000000011981       | ENSG00000197223     | C1D       | C1D nuclear receptor co-repressor                                    |
| Chr06   | <i>Trans</i>       | ENSGACG000000018659       | ENSG00000112983     | BRD8      | Bromodomain containing 8                                             |
| Chr06   | <i>Trans</i>       | ENSGACG000000004982       | ENSG00000065883     | CDK13     | Cyclin-dependent kinase 13                                           |
| Chr06   | <i>Trans</i>       | ENSGACG000000005983       | ENSG00000168036     | CTNNB1    | Catenin (cadherin-associated protein), beta 1, 88kDa                 |
| Chr06   | <i>Trans</i>       | ENSGACG000000003088       | ENSG00000116580     | GON4L     | Gon-4-like                                                           |
| Chr06   | <i>Trans</i>       | ENSGACG000000008525       | ENSG00000100644     | HIF1A     | Hypoxia inducible factor 1, alpha subunit                            |
| Chr06   | <i>Trans</i>       | ENSGACG000000013704       | ENSG00000096968     | JAK2      | Janus kinase 2                                                       |
| Chr07   | <i>Cis/Hotspot</i> | ENSGACG000000018669       | ENSG00000137462     | TLR2      | Toll-like receptor 2                                                 |
| Chr07   | Hotspot            | ENSGACG000000000325       | ENSG00000135625     | EGR4      | Early growth response 4                                              |
| Chr07   | Hotspot            | ENSGACG000000018606       | ENSG00000109670     | FBXW7     | F-box And WD repeat domain containing 7, E3 ubiquitin protein ligase |
| Chr07   | Hotspot            | ENSGACG000000000304       | ENSG00000170448     | NFXL1     | Nuclear transcription factor, X-box binding-like 1                   |
| Chr07   | Hotspot            | ENSGACG000000000370       | ENSG00000164985     | PSIP1     | PC4 and SFRS1 interacting protein 1                                  |
| Chr07   | Hotspot            | ENSGACG000000018586       | ENSG00000074966     | TXK       | Tyrosine kinase                                                      |

|        |              |                    |                 |          |                                                                                                                  |
|--------|--------------|--------------------|-----------------|----------|------------------------------------------------------------------------------------------------------------------|
| Chr07  | <i>Trans</i> | ENSGACG0000000333  | ENSG00000173801 | JUP      | Junction plakoglobin                                                                                             |
| Chr08  | Hotspot      | ENSGACG00000014457 | ENSG00000162733 | DDR2     | Discoidin domain receptor tyrosine kinase 2                                                                      |
| Chr08  | Hotspot      | ENSGACG00000014404 | ENSG00000187764 | SEMA4D   | Sema domain, immunoglobulin domain (Ig), transmembrane domain (TM) and short cytoplasmic domain, (Semaphorin) 4D |
| Chr08  | <i>Trans</i> | ENSGACG00000006033 | ENSG00000125686 | MED1     | Mediator complex subunit 1                                                                                       |
| Chr08  | <i>Trans</i> | ENSGACG00000017475 | ENSG00000137699 | TRIM29   | tripartite motif containing 29                                                                                   |
| Chr09  | Hotspot      | ENSGACG00000019898 | ENSG00000162961 | DPY30    | Dpy-30 histone methyltransferase complex regulatory subunit                                                      |
| Chr09  | Hotspot      | ENSGACG00000019915 | ENSG00000132664 | POLR3F   | Polymerase (RNA) III (DNA directed) polypeptide F, 39 KDa                                                        |
| Chr09  | Hotspot      | ENSGACG00000020002 | ENSG00000112658 | SRF      | Serum response factor                                                                                            |
| Chr12a | <i>Cis</i>   | ENSGACG00000000816 | ENSG00000126767 | ELK1     | ELK1, member of ETS oncogene family                                                                              |
| Chr12a | Hotspot      | ENSGACG00000000295 | ENSG00000146109 | ABT1     | Activator of basal transcription 1                                                                               |
| Chr12a | Hotspot      | ENSGACG00000000248 | ENSG00000106785 | TRIM14   | Tripartite motif containing 14                                                                                   |
| Chr12a | <i>Trans</i> | ENSGACG00000019625 | ENSG00000164134 | NAA15    | N(Alpha)-acetyltransferase 15, NatA auxiliary subunit                                                            |
| Chr12a | <i>Trans</i> | ENSGACG00000001088 | ENSG00000111581 | NUP107   | Nucleoporin 107kDa                                                                                               |
| Chr12b | Hotspot      | ENSGACG00000011155 | ENSG00000101017 | CD40     | CD40 molecule, TNF receptor superfamily member 5                                                                 |
| Chr12b | Hotspot      | ENSGACG00000010943 | ENSG00000110925 | CSRNP2   | Cysteine-serine-rich nuclear protein 2                                                                           |
| Chr12b | Hotspot      | ENSGACG00000011240 | ENSG00000163349 | HIPK1    | Homeodomain interacting protein kinase 1                                                                         |
| Chr12b | Hotspot      | ENSGACG00000011086 | ENSG00000101096 | NFATC2IP | Nuclear factor of activated T-cells, cytoplasmic, calcineurin-dependent 2                                        |
| Chr12b | Hotspot      | ENSGACG00000010788 | ENSG00000123358 | NR4A1    | Nuclear receptor subfamily 4, group A, member 1                                                                  |



|        |                    |                    |                 |         |                                                                                  |
|--------|--------------------|--------------------|-----------------|---------|----------------------------------------------------------------------------------|
| Chr12b | Hotspot            | ENSGACG00000010925 | ENSG00000184271 | POU6F1  | POU class 6 homeobox 1                                                           |
| Chr12b | Hotspot            | ENSGACG00000010990 | ENSG00000079337 | RAPGEF3 | Rap guanine nucleotide exchange factor (GEF) 3                                   |
| Chr12b | Hotspot            | ENSGACG00000010838 | ENSG00000181852 | RNF41   | Ring finger protein 41, E3 ubiquitin protein ligase                              |
| Chr12b | Hotspot            | ENSGACG00000010929 | ENSG00000135457 | TFCP2   | Transcription factor CP2                                                         |
| Chr12b | Hotspot            | ENSGACG00000011135 | ENSG00000182463 | TSHZ2   | Teashirt zinc finger homeobox 2                                                  |
| Chr12b | Hotspot            | ENSGACG00000011187 | ENSG00000204859 | ZBTB48  | Zinc finger and BTB domain containing 48                                         |
| Chr12b | Hotspot            | ENSGACG00000011128 | ENSG00000020256 | ZFP64   | Zinc finger protein 64                                                           |
| Chr12b | Hotspot            | ENSGACG00000011124 | ENSG00000101115 | SALL4   | Spalt-like transcription factor 4                                                |
| Chr12b | <i>Trans</i>       | ENSGACG00000006074 | ENSG00000185513 | L3MBTL1 | L(3)mbt-like                                                                     |
| Chr12b | <i>Trans</i>       | ENSGACG00000011682 | ENSG00000162761 | LIMX1A  | LIM homeobox transcription factor 1, alpha                                       |
| Chr12b | <i>Trans</i>       | ENSGACG00000004938 | ENSG00000012504 | NR1H4   | Nuclear receptor subfamily 1, group h, member 4                                  |
| Chr12c | <i>Cis/Hotspot</i> | ENSGACG00000004839 | ENSG00000188157 | AGRN    | Agrin                                                                            |
| Chr12c | Hotspot            | ENSGACG00000004256 | ENSG00000101126 | ADNP    | Activity-dependent neuroprotector homeobox                                       |
| Chr12c | Hotspot            | ENSGACG00000004544 | ENSG00000009307 | CSDE1   | Cold shock domain containing E1, RNA-binding                                     |
| Chr12c | Hotspot            | ENSGACG00000004732 | ENSG00000101412 | E2F1    | E2F transcription factor 1                                                       |
| Chr12c | Hotspot            | ENSGACG00000004740 | ENSG00000078747 | ITCH    | Itchy E3 ubiquitin protein ligase                                                |
| Chr12c | Hotspot            | ENSGACG00000004213 | ENSG00000197780 | TAF13   | TAF13 RNA Polymerase II, TATA box binding protein (TBP)-associated factor, 18kDa |
| Chr12c | Hotspot            | ENSGACG00000004773 | ENSG00000122691 | TWIST2  | Twist homolog 2                                                                  |
| Chr12c | Hotspot            | ENSGACG00000004763 | ENSG00000111424 | VDR     | Vitamin D (1,25- dihydroxyvitamin D3) receptor                                   |
| Chr12c | Hotspot            | ENSGACG00000004662 | ENSG00000197114 | ZGPAT   | Zinc finger, CCCH-type with G patch domain                                       |

|        |              |                    |                 |        |                                                                                |
|--------|--------------|--------------------|-----------------|--------|--------------------------------------------------------------------------------|
| Chr12c | Hotspot      | ENSGACG0000004734  | ENSG00000131061 | ZNF341 | Zinc finger protein 341                                                        |
| Chr12c | <i>Trans</i> | ENSGACG00000017068 | ENSG00000104221 | BRF2   | BRF2, subunit of RNA polymerase III transcription initiation factor, BRF1-like |
| Chr16  | <i>Trans</i> | ENSGACG00000012487 | ENSG00000125845 | BMP2   | Bone morphogenetic protein 2                                                   |
| Chr16  | <i>Trans</i> | ENSGACG00000005831 | ENSG00000153234 | NR4A2  | Nuclear receptor subfamily 4, group A, member 2                                |
| Chr18  | Hotspot      | ENSGACG00000012487 | ENSG00000125845 | BMP2   | Bone morphogenetic protein 2                                                   |
| Chr18  | Hotspot      | ENSGACG00000012415 | ENSG00000125812 | GZF1   | GDNF-inducible zinc finger protein 1                                           |
| Chr18  | Hotspot      | ENSGACG00000012595 | ENSG00000100811 | YY1    | YY1 transcription factor                                                       |
| Chr18  | Hotspot      | ENSGACG00000012744 | ENSG00000165588 | OTX2   | Orthodenticle homeobox 2                                                       |
| Chr18  | <i>Trans</i> | ENSGACG00000016702 | ENSG00000103449 | SALL1  | Spalt-like transcription factor 1                                              |

---

780 **Figure Legend**

781 **Figure 1** Position of SNP markers along each chromosome (top) and location of *trans* eQTL hits for  
782 all assayed genes (bottom). Black bars show the number of eQTL hits at each 1cM Kosambi interval  
783 along the chromosome. Blue shading shows the number of eQTL with 95% confidence intervals  
784 overlapping each 1cM interval. Arrows indicate the location of eight significant *trans* eQTL hotspots.  
785 Figure created using ggplot2 (Wickham 2009) in R.

786 **Figure 2:** Networks of known protein-protein interactions inferred by String 10 for proteins  
787 associated with a) Chr6 hotspot and b) Chr12b hotspot. ‘Upstream Regulator’: significantly enriched  
788 upstream regulator identified when examining genes *trans*-regulated by the hotspot using IPA;  
789 ‘Hotspot Location’: protein is coded by a gene physically located in the hotspot; ‘Trans regulated’:  
790 protein is *trans* regulated by an eQTL mapping to the hotspot and significant at genome-wide  
791  $p < 0.021$ ; Cis/Hotspot: both present in and significantly *cis* regulated by the hotspot. Interactions not  
792 involving an identified upstream regulator are not shown.

793

**Figure 1**

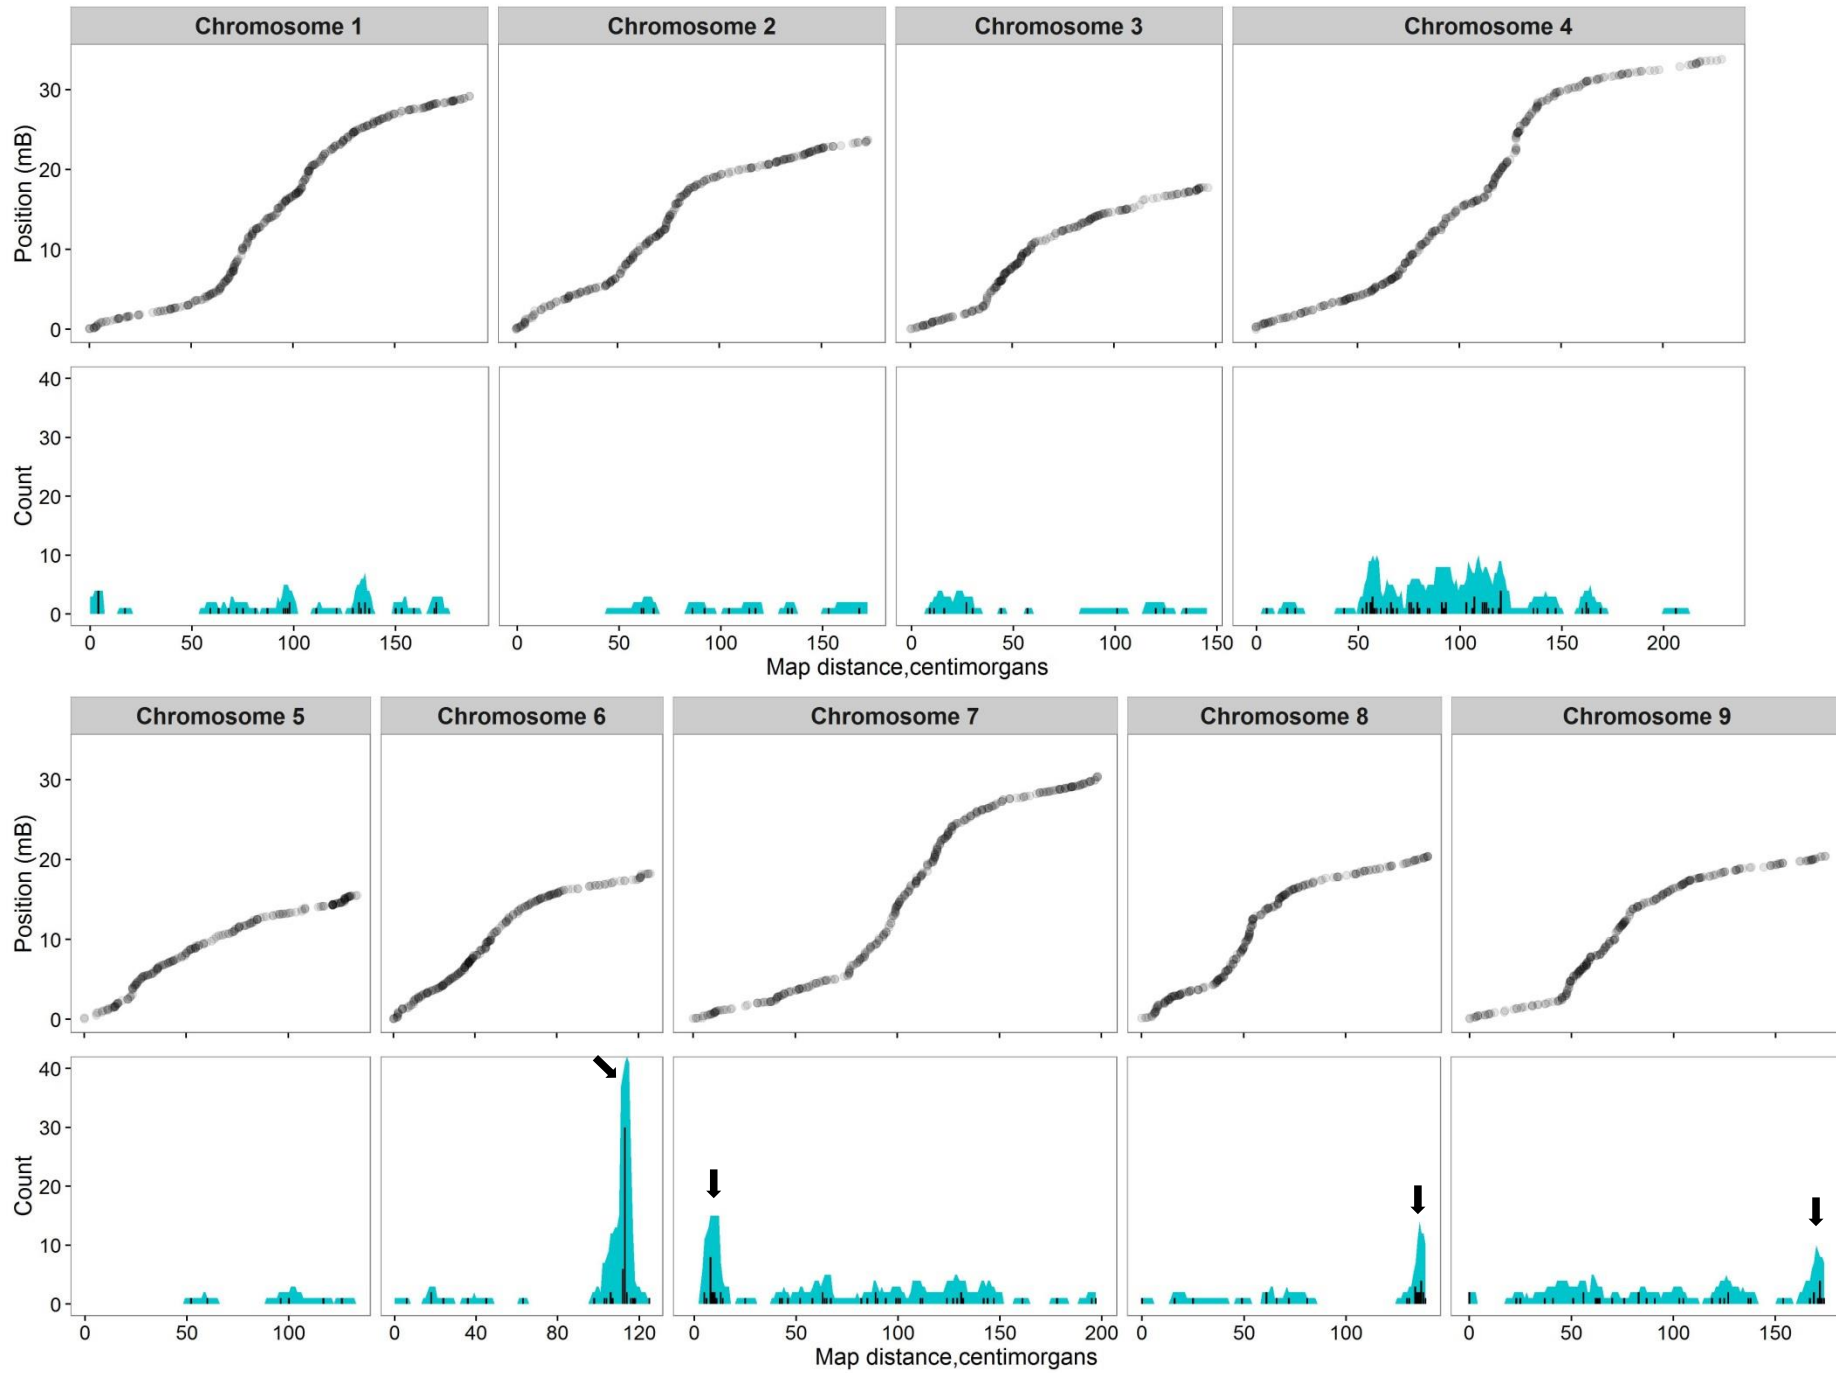

Figure 1 (cont.)

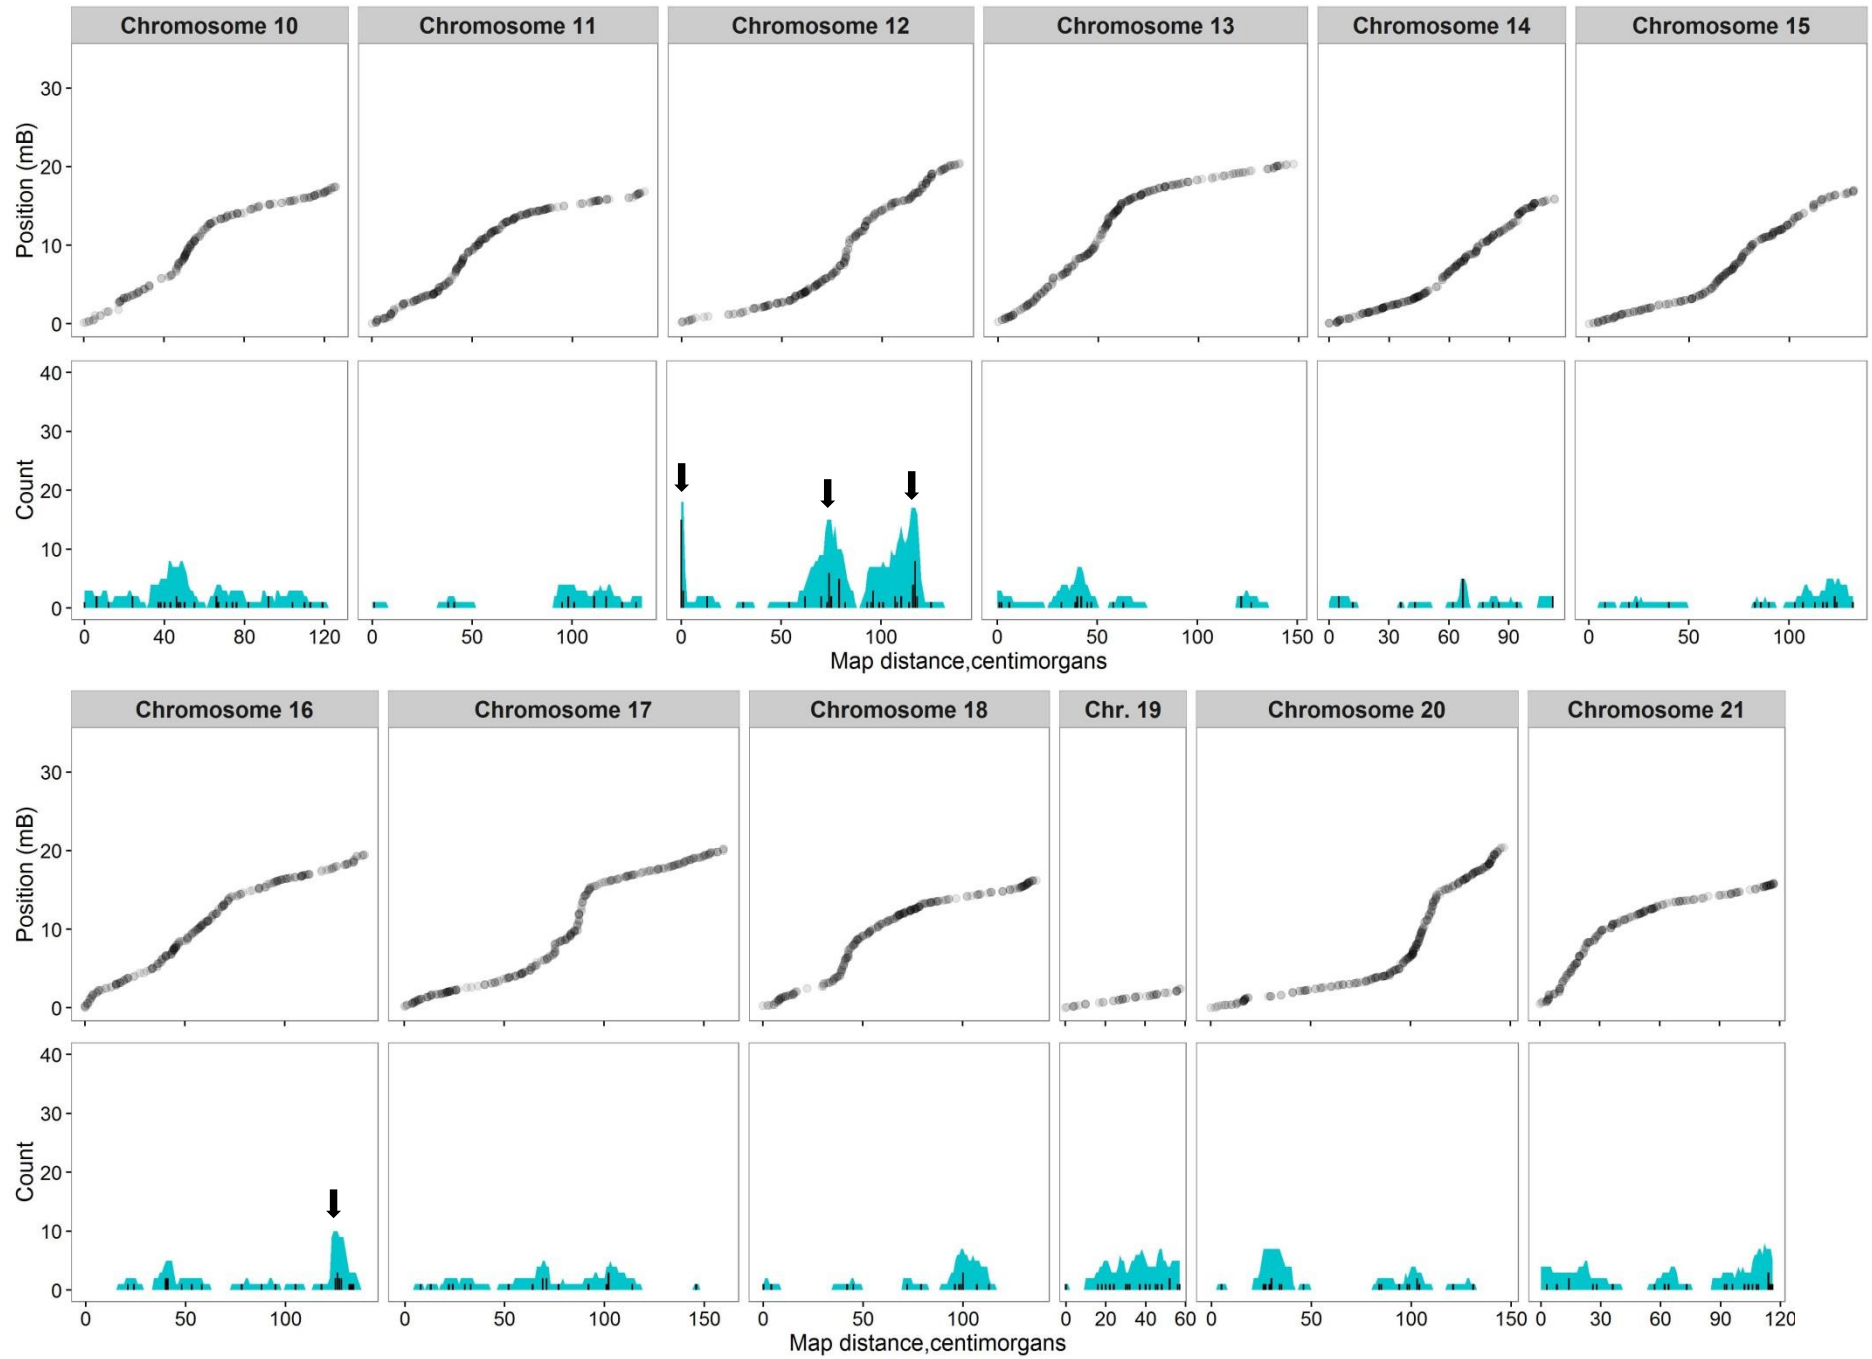

**Figure 2a: Chr6**

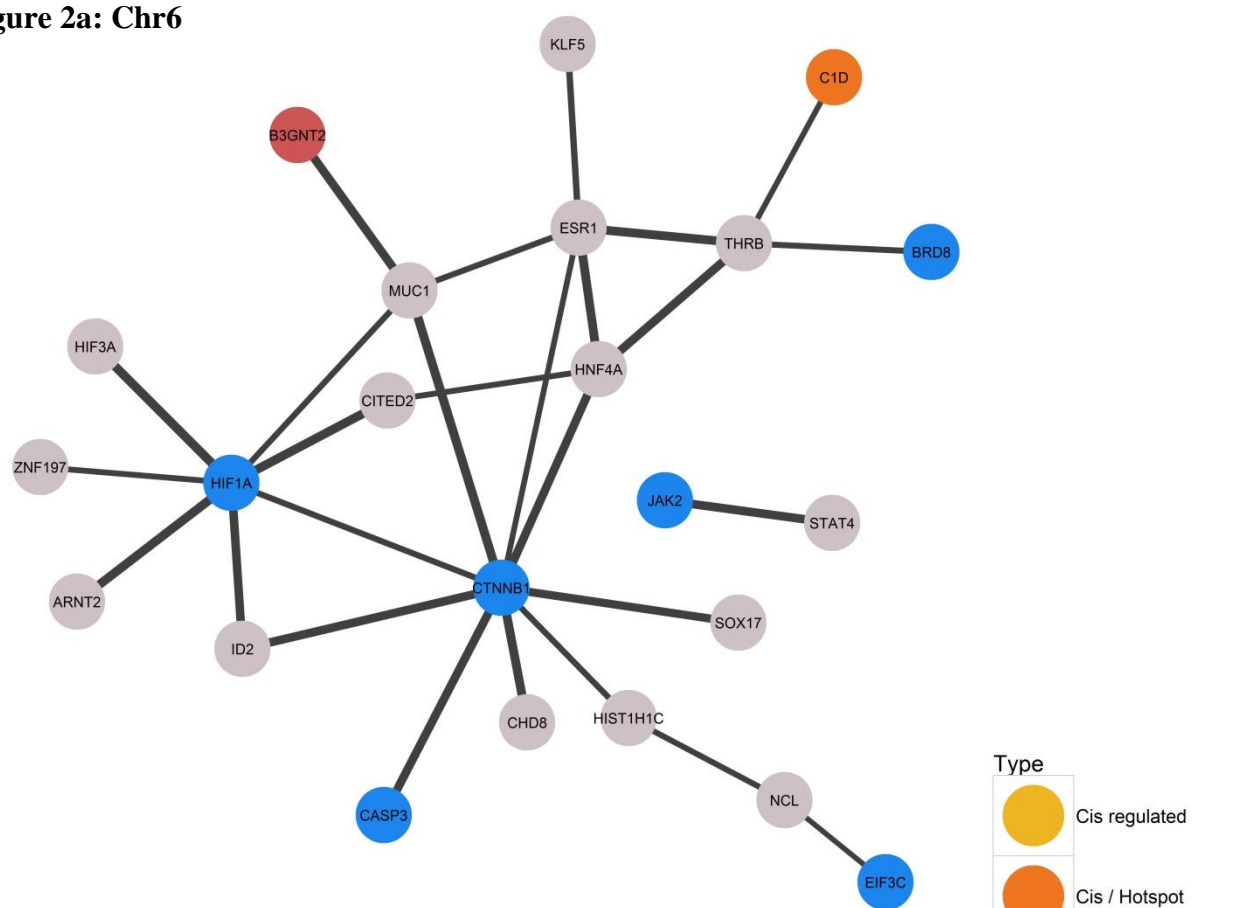

**Figure 2b: Chr12b**

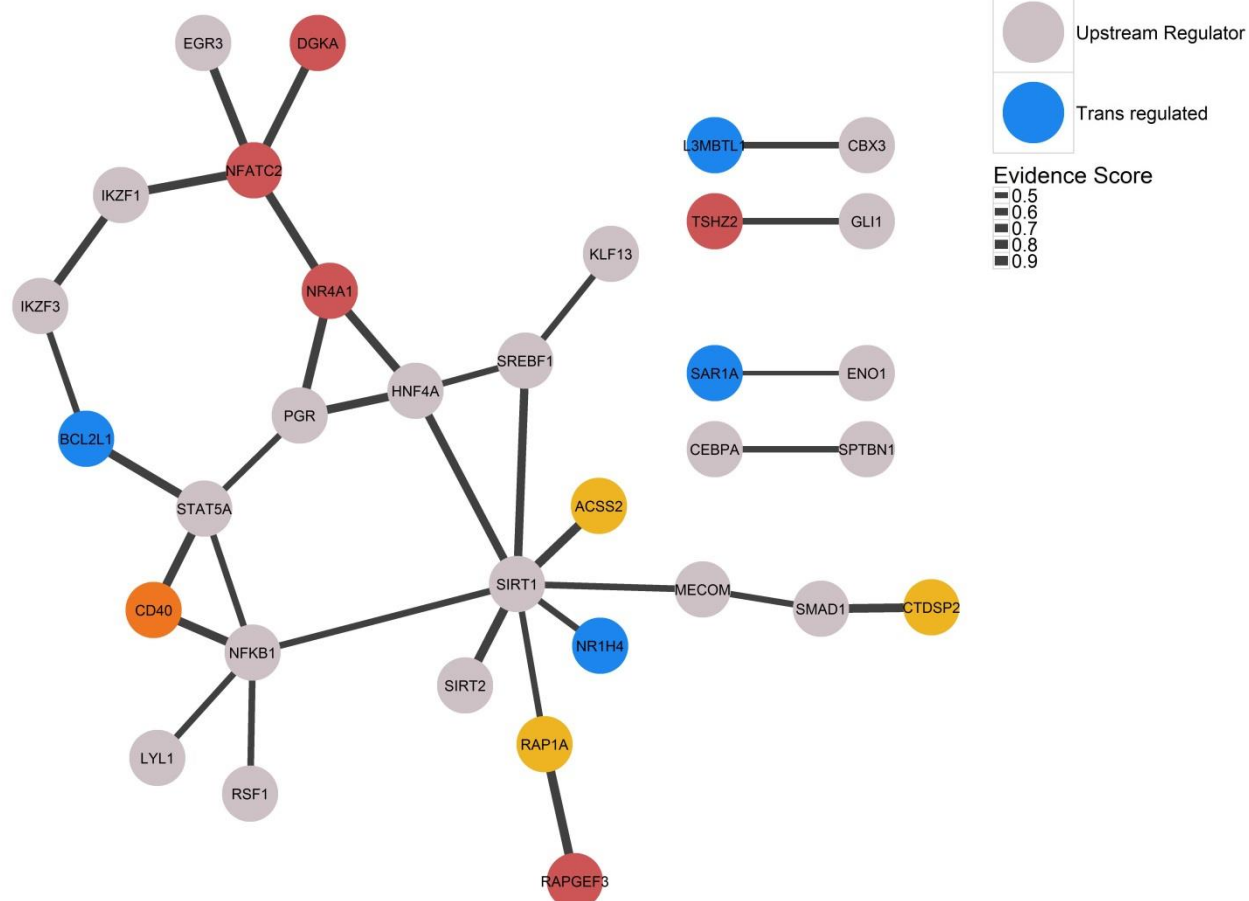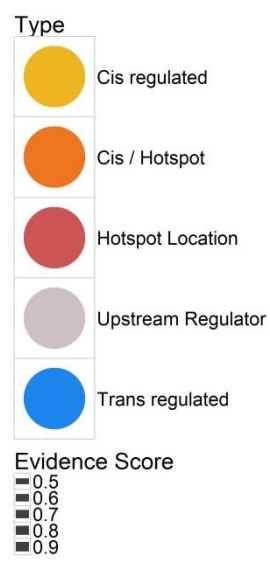

Source: http://www.biorxiv.org/content/10.1101/055061v1.full.pdf
